# Supplementary material for: Probe metal binding mode of imine covalent organic frameworks: cycloiridation for (photo)catalytic hydrogen evolution from formate
Source: Royal Society of Chemistry journal article supplement (doi:10.1039/d1sc01692j), 2021-01-01
Supplement: d1sc01692j1.pdf [file d1sc01692j1.pdf]

### Cartesian Coordinates of All the Structures

#### IM-1

|   |              |             |             |
|---|--------------|-------------|-------------|
| C | -22.04468700 | -1.51762400 | 0.49314500  |
| C | -21.18584600 | 0.80701600  | 0.54149400  |
| H | -23.06039700 | -1.13245100 | 0.47631400  |
| C | -20.96225500 | -0.57738200 | 0.52522600  |
| C | -20.47460900 | -3.37695500 | 0.51218300  |
| C | -21.81121200 | -2.85770400 | 0.48647800  |
| C | -20.21712100 | -4.75548500 | 0.51538100  |
| H | -22.63685200 | -3.56348300 | 0.46413000  |
| C | -1.63752300  | 14.17854700 | -0.56857600 |
| C | -0.67753300  | 16.42494900 | -0.59023600 |
| C | -2.16752600  | 18.40896100 | -0.54326600 |
| H | 0.18775100   | 17.08144200 | -0.61955100 |
| H | -13.17056500 | 3.94130700  | -0.06598600 |
| C | -18.52740600 | -0.13587700 | 0.57580600  |
| H | 4.64577400   | 11.67928600 | 0.16150500  |
| C | -4.42784100  | 16.73250700 | -0.58569100 |
| C | -5.40776000  | 14.50369000 | -0.65377100 |
| C | -3.92996300  | 12.48525000 | -0.59829600 |
| C | -5.06379200  | 11.52965600 | -0.57222800 |
| C | -5.11459300  | 10.47026400 | -1.49419900 |
| C | -6.12900300  | 9.52329500  | -1.44465500 |
| C | -7.15026200  | 9.62012700  | -0.48620700 |
| C | -7.09610700  | 10.66546100 | 0.45307100  |
| C | -6.06654700  | 11.59899400 | 0.40938200  |
| H | -6.27863400  | 13.86393100 | -0.72523700 |
| H | -4.34596200  | 10.39838900 | -2.25752200 |
| H | -6.16482900  | 8.70315400  | -2.15397300 |
| H | -7.83532200  | 10.71323400 | 1.24652500  |
| H | -6.01653100  | 12.37758300 | 1.16384200  |
| C | -12.44919900 | 5.99229800  | 0.06199700  |
| C | -11.13480200 | 5.61072000  | -0.26209400 |
| C | -10.12126300 | 6.55337400  | -0.34017200 |
| C | -10.40029500 | 7.90841200  | -0.09392200 |
| C | -11.71426100 | 8.29013200  | 0.23147300  |
| C | -12.72859700 | 7.34730700  | 0.30777100  |
| H | -10.91778800 | 4.56268800  | -0.45192300 |
| H | -9.10412500  | 6.27286300  | -0.58961600 |
| H | -11.93112000 | 9.33794300  | 0.42267400  |
| H | -13.74582800 | 7.62841600  | 0.55646100  |
| C | -13.49539000 | 4.97254200  | 0.13531800  |
| N | -14.71133100 | 5.25382200  | 0.42971000  |
| C | 15.00051600  | 3.57100300  | 0.64568500  |

|   |             |             |             |
|---|-------------|-------------|-------------|
| C | 15.84639400 | 5.92288800  | 0.45965300  |
| C | 14.49102200 | 6.52144700  | 0.49133000  |
| C | 14.19315000 | 7.55968000  | 1.39076100  |
| C | 12.95489800 | 8.18805100  | 1.37725100  |
| C | 11.95539800 | 7.78068300  | 0.47924200  |
| C | 12.24992200 | 6.75185300  | -0.43380900 |
| C | 13.49701000 | 6.13784400  | -0.42532600 |
| H | 13.99773100 | 3.94151700  | 0.82134500  |
| H | 14.94750700 | 7.86989900  | 2.10721900  |
| H | 12.72815700 | 8.99384300  | 2.06747800  |
| H | 11.51691600 | 6.47179600  | -1.18381300 |
| H | 13.72295800 | 5.37256700  | -1.16094600 |
| C | 4.60707700  | 10.60329300 | -0.06284600 |
| N | 3.51440400  | 10.01934100 | -0.39304000 |
| C | -4.10948400 | 13.89043300 | -0.59443100 |
| C | -5.55975900 | 15.85584500 | -0.64103200 |
| C | -4.56727600 | 18.12924500 | -0.56822000 |
| H | -6.55204300 | 16.29582300 | -0.68960200 |
| H | 9.60566300  | 6.79004800  | 0.00847900  |
| C | 16.06266100 | 4.52110300  | 0.47052900  |
| H | -9.65836000 | 9.95447500  | 0.05229100  |
| C | -1.98160400 | 17.01764300 | -0.56024800 |
| C | -0.51417800 | 15.07412700 | -0.60274500 |
| C | -1.48872400 | 12.76967800 | -0.57262900 |
| C | -0.16549800 | 12.10171300 | -0.52202400 |
| C | 0.14975700  | 11.08870100 | -1.44356700 |
| C | 1.35830500  | 10.40770900 | -1.37689100 |
| C | 2.31124600  | 10.73840600 | -0.40052500 |
| C | 1.99363900  | 11.73351600 | 0.54118000  |
| C | 0.77378200  | 12.39798900 | 0.47980900  |
| H | 0.48173500  | 14.65196000 | -0.65461500 |
| H | -0.56598400 | 10.84264100 | -2.22192600 |
| H | 1.59998300  | 9.62480100  | -2.08801300 |
| H | 2.68675500  | 11.94974400 | 1.34808700  |
| H | 0.52804700  | 13.13842200 | 1.23434700  |
| C | 8.35974100  | 8.57277900  | 0.16383300  |
| C | 7.18996200  | 7.86406000  | -0.16418100 |
| C | 5.96555600  | 8.51113300  | -0.23790300 |
| C | 5.88225400  | 9.89052000  | 0.01703500  |
| C | 7.05122800  | 10.59816500 | 0.35008600  |
| C | 8.27564200  | 9.95166300  | 0.42178900  |
| H | 7.25353000  | 6.79742600  | -0.36363000 |
| H | 5.05712300  | 7.97720200  | -0.49341100 |
| H | 6.98782200  | 11.66501600 | 0.54838700  |

|   |              |              |             |
|---|--------------|--------------|-------------|
| H | 9.18495100   | 10.48594400  | 0.67310100  |
| C | 9.64117700   | 7.86843900   | 0.22118400  |
| N | 10.73599700  | 8.47007700   | 0.50966800  |
| C | -17.20153900 | -0.67431300  | 0.69251600  |
| C | -18.79127000 | 1.25772200   | 0.55242200  |
| C | -17.70646200 | 2.26678500   | 0.51728100  |
| C | -17.70863200 | 3.34935900   | 1.41342800  |
| C | -16.72401100 | 4.32780900   | 1.35985800  |
| C | -15.68178800 | 4.24217800   | 0.42321700  |
| C | -15.68870900 | 3.17796900   | -0.49648300 |
| C | -16.68643700 | 2.21163100   | -0.44779700 |
| H | -16.37217400 | 0.01176700   | 0.81408200  |
| H | -18.49006600 | 3.41135800   | 2.16456000  |
| H | -16.72562300 | 5.16216400   | 2.05335100  |
| H | -14.93527800 | 3.13737900   | -1.27678700 |
| H | -16.69666700 | 1.41342300   | -1.18306500 |
| C | -9.34822700  | 8.92286300   | -0.16934300 |
| N | -8.14179000  | 8.63013800   | -0.48942600 |
| C | -3.44772700  | 18.95717200  | -0.54352500 |
| C | -2.95544900  | 14.73689200  | -0.57460200 |
| H | -3.57355800  | 20.03557500  | -0.53034600 |
| C | -2.63213200  | 11.96712500  | -0.60364700 |
| C | -3.12109100  | 16.15743800  | -0.57087300 |
| H | -2.50685500  | 10.88977100  | -0.56887900 |
| C | -19.61793100 | -1.06005500  | 0.54415200  |
| C | -20.12230200 | 1.69881000   | 0.55276300  |
| H | -20.31554700 | 2.76677400   | 0.52959000  |
| C | 2.33199900   | -15.07934400 | -0.79156700 |
| C | 3.41942300   | -12.90209500 | -0.69411900 |
| C | 2.03784000   | -10.81949400 | -0.56904300 |
| C | 3.22523300   | -9.93751700  | -0.45029600 |
| C | 3.41892300   | -8.87617400  | -1.35164300 |
| C | 4.50728500   | -8.01920500  | -1.23733000 |
| C | 5.43826100   | -8.22089600  | -0.21121400 |
| C | 5.25614400   | -9.26226100  | 0.70581500  |
| C | 4.15645300   | -10.10852800 | 0.58519300  |
| H | 4.32228200   | -12.30406800 | -0.69835800 |
| H | 2.71035700   | -8.73835300  | -2.16256900 |
| H | 4.67249400   | -7.20541900  | -1.93557700 |
| H | 5.95888200   | -9.38251700  | 1.52448200  |
| H | 4.00402400   | -10.89938000 | 1.31235400  |
| C | 10.63678400  | -4.73949000  | 0.25565900  |
| C | 9.26877700   | -4.44814500  | 0.15034800  |
| C | 8.30393000   | -5.46065000  | 0.11897200  |

|   |              |              |             |
|---|--------------|--------------|-------------|
| C | 8.78705400   | -6.79923300  | 0.13498000  |
| C | 10.15926700  | -7.10295400  | 0.23077400  |
| C | 11.08164200  | -6.07896800  | 0.30677100  |
| H | 8.96351600   | -3.40832000  | 0.07708200  |
| H | 10.48492700  | -8.14021900  | 0.23682300  |
| H | 12.14528100  | -6.26881100  | 0.38782500  |
| C | 11.60018400  | -3.63810500  | 0.30336700  |
| N | 12.85451700  | -3.83946600  | 0.47783600  |
| C | -16.96776900 | -2.01556100  | 0.68905700  |
| C | -17.81044600 | -4.37067000  | 0.53405000  |
| C | -16.45033800 | -4.95892200  | 0.50330000  |
| C | -16.10614000 | -5.99674400  | 1.38667900  |
| C | -14.85775900 | -6.60235200  | 1.33169400  |
| C | -13.89290400 | -6.16945600  | 0.40809800  |
| C | -14.23550200 | -5.14564900  | -0.49333200 |
| C | -15.49411600 | -4.55691300  | -0.44512200 |
| H | -15.95515700 | -2.38107800  | 0.80877500  |
| H | -16.83080400 | -6.32209500  | 2.12665500  |
| H | -14.59471500 | -7.40567800  | 2.01180600  |
| H | -13.52950200 | -4.84845200  | -1.26248400 |
| H | -15.75682800 | -3.79364100  | -1.17051200 |
| C | -6.47171800  | -8.77569200  | -0.18582100 |
| N | -5.37758700  | -8.16047600  | -0.44909000 |
| C | -0.33046000  | -12.39382500 | -0.70463200 |
| C | -1.39652600  | -14.58456200 | -0.88999100 |
| C | -0.00636200  | -16.64036600 | -0.91876800 |
| H | -2.29119900  | -15.19376400 | -0.98460900 |
| H | 11.18244100  | -2.62611200  | 0.19482700  |
| C | 16.54180600  | 1.68372500   | 0.43665700  |
| H | -6.49704400  | -9.86198100  | -0.01607600 |
| C | -0.12443500  | -15.24295600 | -0.85751600 |
| C | -1.49425700  | -13.22900300 | -0.82505400 |
| C | -0.41151400  | -10.98108300 | -0.62775300 |
| C | -1.70932200  | -10.26557900 | -0.56652700 |
| C | -1.98543100  | -9.20729500  | -1.44823600 |
| C | -3.18777700  | -8.51321200  | -1.38250100 |
| C | -4.17045400  | -8.87490800  | -0.44752300 |
| C | -3.88474400  | -9.90632200  | 0.46506400  |
| C | -2.67323600  | -10.58463800 | 0.40439600  |
| H | -2.46669800  | -12.75586600 | -0.87954900 |
| H | -1.24904000  | -8.94110600  | -2.20044600 |
| H | -3.40310300  | -7.70101900  | -2.06883800 |
| H | -4.59998800  | -10.14559400 | 1.24562000  |
| H | -2.45624700  | -11.36164100 | 1.13048400  |

|   |              |              |             |
|---|--------------|--------------|-------------|
| C | -10.27936900 | -6.85204700  | 0.04701400  |
| C | -9.12531000  | -6.10055800  | -0.23904200 |
| C | -7.88177700  | -6.71078700  | -0.31583400 |
| C | -7.76446600  | -8.09570500  | -0.10967700 |
| C | -8.91897500  | -8.84686700  | 0.17576000  |
| C | -10.16125500 | -8.23692400  | 0.25391800  |
| H | -9.21527800  | -5.02931100  | -0.39976000 |
| H | -6.98484200  | -6.14238500  | -0.53537600 |
| H | -8.82908600  | -9.91834800  | 0.33483700  |
| H | -11.05865900 | -8.80430500  | 0.47333500  |
| C | -11.58078200 | -6.18616200  | 0.12355500  |
| N | -12.65522600 | -6.82604400  | 0.40614300  |
| C | 15.22772400  | 2.22836800   | 0.63192100  |
| C | 16.79781400  | 0.28900900   | 0.39190200  |
| C | 15.72019900  | -0.72805400  | 0.43257200  |
| C | 15.82370700  | -1.82718100  | 1.30358400  |
| C | 14.87322600  | -2.83848200  | 1.30095100  |
| C | 13.76074300  | -2.77298800  | 0.44630700  |
| C | 13.65224000  | -1.68150100  | -0.43393700 |
| C | 14.62005600  | -0.68212200  | -0.44059700 |
| H | 14.40341900  | 1.54539800   | 0.79769300  |
| H | 16.66422500  | -1.88000600  | 1.98869700  |
| H | 14.96090300  | -3.69110300  | 1.96617400  |
| H | 12.83637600  | -1.64952800  | -1.14932800 |
| H | 14.54538200  | 0.13006600   | -1.15664300 |
| C | 7.75828100   | -7.78405700  | 0.00048600  |
| N | 6.53672000   | -7.33792200  | -0.08848700 |
| C | 2.15023100   | -12.22951600 | -0.64104900 |
| C | 3.50585500   | -14.25845700 | -0.75784300 |
| C | 2.40362800   | -16.47984400 | -0.85390500 |
| H | 4.47704400   | -14.74364000 | -0.80089100 |
| H | -11.57869200 | -5.10225400  | -0.06255900 |
| C | -18.03322000 | -2.97009600  | 0.56663300  |
| H | 7.95881900   | -8.85313800  | -0.06107300 |
| C | 0.76926400   | -10.23444300 | -0.58294000 |
| C | 1.05468400   | -14.44183200 | -0.78247900 |
| H | 0.69598400   | -9.15499600  | -0.49394300 |
| C | 1.24535900   | -17.25081900 | -0.91336500 |
| C | 0.95757100   | -13.01705000 | -0.70665900 |
| H | 1.31876400   | -18.33301700 | -0.96156200 |
| C | -18.91486800 | -5.23513000  | 0.52416700  |
| H | -18.73630200 | -6.30536000  | 0.49178700  |
| C | -19.37232800 | -2.46883600  | 0.53843100  |
| C | 18.49927800  | 4.91715900   | 0.28337900  |

|    |              |              |             |
|----|--------------|--------------|-------------|
| C  | 19.82948200  | 4.39291800   | 0.17421000  |
| C  | 18.25019700  | 6.29675700   | 0.31519100  |
| H  | 20.65578900  | 5.09541100   | 0.11068400  |
| C  | 17.39544300  | 4.01372300   | 0.36411900  |
| C  | 16.95306400  | 6.78238100   | 0.39908200  |
| H  | 16.77819200  | 7.85360500   | 0.38460600  |
| C  | 20.05558900  | 3.05190000   | 0.15221600  |
| C  | 19.19004700  | 0.73176800   | 0.22822800  |
| H  | 21.06626700  | 2.66173200   | 0.07063800  |
| C  | 18.97209300  | 2.11676100   | 0.23969500  |
| C  | 18.12559300  | -0.15505100  | 0.30063100  |
| H  | 18.31304900  | -1.22318200  | 0.25597900  |
| C  | 17.63329800  | 2.60376600   | 0.34427000  |
| H  | -0.90874500  | -17.24264400 | -0.97464800 |
| H  | -1.29500000  | 19.05612300  | -0.53378200 |
| H  | -5.56525700  | 18.55837300  | -0.57820100 |
| H  | 19.08683800  | 6.98706400   | 0.25436100  |
| H  | 20.20619600  | 0.35651200   | 0.14535300  |
| H  | 3.37954300   | -16.95702300 | -0.85925800 |
| H  | -21.05233700 | -5.44984000  | 0.49410200  |
| H  | -22.20674600 | 1.17815200   | 0.52743100  |
| Ir | 6.30042000   | -5.26634800  | -0.00610600 |
| C  | 5.24568700   | -4.91467700  | 1.87511000  |
| C  | 6.03498600   | -3.74739300  | 1.54898900  |
| C  | 5.54263900   | -3.22723600  | 0.30108400  |
| C  | 4.33240400   | -3.98314800  | -0.04561300 |
| C  | 4.14339900   | -4.99305800  | 0.91370700  |
| C  | 3.03558200   | -5.99590700  | 0.97998700  |
| C  | 3.51688800   | -3.72165900  | -1.26977000 |
| C  | 6.01425100   | -2.00920300  | -0.42876900 |
| C  | 7.12380400   | -3.17212400  | 2.39692900  |
| C  | 5.36068400   | -5.74528600  | 3.11552800  |
| H  | 3.40150800   | -6.97602000  | 1.29419000  |
| H  | 2.54871800   | -6.12471300  | 0.01244500  |
| H  | 2.27638200   | -5.67624200  | 1.70446100  |
| H  | 3.07786200   | -2.71811700  | -1.23256100 |
| H  | 2.70543900   | -4.44455700  | -1.37253600 |
| H  | 4.14829100   | -3.78852400  | -2.16143900 |
| H  | 6.01133100   | -2.18755600  | -1.50679000 |
| H  | 7.03484600   | -1.74715000  | -0.14039300 |
| H  | 5.37221300   | -1.14468300  | -0.21784800 |
| H  | 6.68850800   | -2.56285100  | 3.19789500  |
| H  | 7.79009900   | -2.53276900  | 1.81647900  |
| H  | 7.73104900   | -3.95589900  | 2.85422100  |

|    |            |             |             |
|----|------------|-------------|-------------|
| H  | 6.38375700 | -5.73902300 | 3.49774000  |
| H  | 5.08415200 | -6.78386500 | 2.91574400  |
| H  | 4.69994200 | -5.36877300 | 3.90651600  |
| Cl | 6.52462800 | -5.22235700 | -2.43381600 |

**IM-2**

|   |              |             |             |
|---|--------------|-------------|-------------|
| C | -22.11246400 | -1.44428800 | 0.56462700  |
| C | -21.23746300 | 0.87413700  | 0.62296400  |
| H | -23.12561400 | -1.05214900 | 0.55657400  |
| C | -21.02348400 | -0.51163900 | 0.59658500  |
| C | -20.55500300 | -3.31431700 | 0.56095800  |
| C | -21.88816400 | -2.78584700 | 0.54706300  |
| C | -20.30685700 | -4.69454600 | 0.55200300  |
| H | -22.71871800 | -3.48583500 | 0.52461900  |
| C | -1.62218300  | 14.13303700 | -0.62601500 |
| C | -0.65593100  | 16.37634400 | -0.67536800 |
| C | -2.14013200  | 18.36502800 | -0.64460800 |
| H | 0.21110500   | 17.02998600 | -0.71485800 |
| H | -13.20440400 | 3.95469600  | -0.01680300 |
| C | -18.58547300 | -0.08700900 | 0.63562900  |
| H | 4.65653800   | 11.63192500 | 0.10467900  |
| C | -4.40530700  | 16.69469100 | -0.66097100 |
| C | -5.39172000  | 14.46807300 | -0.70159000 |
| C | -3.91938000  | 12.44613100 | -0.62995800 |
| C | -5.05625200  | 11.49457800 | -0.59058100 |
| C | -5.11483600  | 10.42738100 | -1.50298000 |
| C | -6.13342400  | 9.48554300  | -1.44175400 |
| C | -7.15099400  | 9.59538400  | -0.48079800 |
| C | -7.08849400  | 10.64817200 | 0.44962200  |
| C | -6.05497200  | 11.57665500 | 0.39418100  |
| H | -6.26465500  | 13.83008300 | -0.76301200 |
| H | -4.34922300  | 10.34548000 | -2.26832400 |
| H | -6.17560400  | 8.65957900  | -2.14393000 |
| H | -7.82455000  | 10.70614100 | 1.24532700  |
| H | -5.99878300  | 12.36160800 | 1.14158200  |
| C | -12.46884300 | 6.00099000  | 0.10596000  |
| C | -11.15832100 | 5.61029500  | -0.22294600 |
| C | -10.13928700 | 6.54637600  | -0.30836800 |
| C | -10.40882200 | 7.90388300  | -0.06513500 |
| C | -11.71885800 | 8.29467300  | 0.26533700  |
| C | -12.73863100 | 7.35838600  | 0.34927400  |
| H | -10.94873700 | 4.56040700  | -0.41087300 |
| H | -9.12508600  | 6.25884800  | -0.56174700 |
| H | -11.92836700 | 9.34439800  | 0.45421300  |

|   |              |             |             |
|---|--------------|-------------|-------------|
| H | -13.75294800 | 7.64657700  | 0.60174000  |
| C | -13.52128600 | 4.98818200  | 0.18568600  |
| N | -14.73389200 | 5.27750600  | 0.48602800  |
| C | 14.99594600  | 3.52014700  | 0.66784500  |
| C | 15.85102800  | 5.86590800  | 0.44973800  |
| C | 14.49776400  | 6.46957200  | 0.47377200  |
| C | 14.20368600  | 7.52101500  | 1.35898400  |
| C | 12.96667200  | 8.15169800  | 1.33882700  |
| C | 11.96466000  | 7.73363400  | 0.44856500  |
| C | 12.25567500  | 6.69202100  | -0.45099300 |
| C | 13.50156100  | 6.07574600  | -0.43617300 |
| H | 13.99477600  | 3.89679300  | 0.83945500  |
| H | 14.95977200  | 7.83936600  | 2.07004100  |
| H | 12.74264600  | 8.96726300  | 2.01838600  |
| H | 11.52066100  | 6.40275900  | -1.19550100 |
| H | 13.72449300  | 5.29971700  | -1.16135400 |
| C | 4.61611800   | 10.55308600 | -0.10537800 |
| N | 3.52139800   | 9.96601100  | -0.42310200 |
| C | -4.09496400  | 13.85178100 | -0.64030300 |
| C | -5.53987600  | 15.82071300 | -0.70283100 |
| C | -4.54074000  | 18.09193100 | -0.65810600 |
| H | -6.53109100  | 16.26297200 | -0.75255800 |
| H | 9.61310300   | 6.73834200  | -0.00079700 |
| C | 16.06179800  | 4.46353000  | 0.47954400  |
| H | -9.65472200  | 9.94630900  | 0.06767400  |
| C | -1.95819900  | 16.97308000 | -0.64719300 |
| C | -0.49644400  | 15.02500600 | -0.67381400 |
| C | -1.47729900  | 12.72376500 | -0.61529600 |
| C | -0.15557600  | 12.05303300 | -0.56169700 |
| C | 0.15454300   | 11.02943700 | -1.47323600 |
| C | 1.36213600   | 10.34701000 | -1.40349500 |
| C | 2.31920000   | 10.68660800 | -0.43422200 |
| C | 2.00657600   | 11.69226100 | 0.49790300  |
| C | 0.78768500   | 12.35823900 | 0.43367100  |
| H | 0.49807600   | 14.59945300 | -0.72458400 |
| H | -0.56435700  | 10.77630300 | -2.24641300 |
| H | 1.59988900   | 9.55603500  | -2.10697100 |
| H | 2.70300200   | 11.91588100 | 1.29992800  |
| H | 0.54597400   | 13.10726100 | 1.18100500  |
| C | 8.36860900   | 8.52384300  | 0.13358500  |
| C | 7.19723900   | 7.81119500  | -0.17995500 |
| C | 5.97281900   | 8.45785000  | -0.25769800 |
| C | 5.89117500   | 9.84065500  | -0.02144200 |
| C | 7.06182800   | 10.55228900 | 0.29697100  |



|   |              |              |             |
|---|--------------|--------------|-------------|
| C | 8.28621700   | 9.90623200   | 0.37266000  |
| H | 7.25945900   | 6.74186200   | -0.36473400 |
| H | 5.06318500   | 7.92073800   | -0.50201800 |
| H | 6.99966000   | 11.62180800  | 0.48081500  |
| H | 9.19678500   | 10.44341900  | 0.61298300  |
| C | 9.64991800   | 7.81959700   | 0.19629900  |
| N | 10.74601000  | 8.42470400   | 0.47260100  |
| C | -17.26277200 | -0.63519600  | 0.74219500  |
| C | -18.83982400 | 1.30849200   | 0.62161600  |
| C | -17.74826600 | 2.31012600   | 0.58386500  |
| C | -17.73768300 | 3.38994300   | 1.48331400  |
| C | -16.74689200 | 4.36198800   | 1.42671100  |
| C | -15.71092500 | 4.27221500   | 0.48351900  |
| C | -15.73038200 | 3.21071300   | -0.43910200 |
| C | -16.73433900 | 2.25102100   | -0.38739200 |
| H | -16.42819000 | 0.04440600   | 0.86445200  |
| H | -18.51413700 | 3.45493700   | 2.23934400  |
| H | -16.73886100 | 5.19427900   | 2.12263800  |
| H | -14.98185800 | 3.16751100   | -1.22397600 |
| H | -16.75437200 | 1.45521600   | -1.12505000 |
| C | -9.35122400  | 8.91185100   | -0.14979700 |
| N | -8.14781900  | 8.61067100   | -0.47346400 |
| C | -3.41877400  | 18.91686600  | -0.64630100 |
| C | -2.93850900  | 14.69509900  | -0.63352800 |
| H | -3.54151000  | 19.99570800  | -0.64434000 |
| C | -2.62308500  | 11.92417100  | -0.63407700 |
| C | -3.10013900  | 16.11607800  | -0.64453000 |
| H | -2.50075300  | 10.84687700  | -0.58840900 |
| C | -19.68241300 | -1.00355500  | 0.60441200  |
| C | -20.16780200 | 1.75860500   | 0.63282100  |
| H | -20.35392200 | 2.82796500   | 0.61682300  |
| C | 2.26209700   | -15.01015900 | -0.97646600 |
| C | 3.33848100   | -12.83362600 | -0.78533500 |
| C | 1.94605600   | -10.76236300 | -0.60071200 |
| C | 3.12715400   | -9.88049200  | -0.43100400 |
| C | 3.32374900   | -8.77928800  | -1.28267500 |
| C | 4.40600600   | -7.92279400  | -1.11795200 |
| C | 5.32843200   | -8.16393400  | -0.09255100 |
| C | 5.14125200   | -9.24480400  | 0.77699800  |
| C | 4.04803600   | -10.09033300 | 0.60698400  |
| H | 4.23878000   | -12.23245300 | -0.75604300 |
| H | 2.62238000   | -8.60922300  | -2.09365100 |
| H | 4.57794300   | -7.07961700  | -1.77803100 |
| H | 5.83430000   | -9.39659500  | 1.59851500  |

|   |              |              |             |
|---|--------------|--------------|-------------|
| H | 3.89140500   | -10.91180500 | 1.29836700  |
| C | 10.57008300  | -4.73705600  | 0.38375700  |
| C | 9.20746400   | -4.42421900  | 0.26202000  |
| C | 8.23048800   | -5.42396900  | 0.23735100  |
| C | 8.68897600   | -6.76855600  | 0.27948600  |
| C | 10.05535100  | -7.09406900  | 0.39164300  |
| C | 10.99285200  | -6.08249100  | 0.45887700  |
| H | 8.91545800   | -3.38416900  | 0.15907000  |
| H | 10.36519600  | -8.13597200  | 0.41813100  |
| H | 12.05280600  | -6.28788000  | 0.55116200  |
| C | 11.54967200  | -3.64941500  | 0.41650800  |
| N | 12.80116700  | -3.86612300  | 0.59464900  |
| C | -17.03816900 | -1.97793100  | 0.72850000  |
| C | -17.89750900 | -4.32619500  | 0.55930300  |
| C | -16.54153800 | -4.92302100  | 0.51567300  |
| C | -16.19972500 | -5.97249700  | 1.38620200  |
| C | -14.95503700 | -6.58455800  | 1.31971100  |
| C | -13.99120500 | -6.14631900  | 0.39760900  |
| C | -14.33163600 | -5.11120500  | -0.49155400 |
| C | -15.58695900 | -4.51647900  | -0.43245600 |
| H | -16.02750600 | -2.35099200  | 0.84103700  |
| H | -16.92313500 | -6.30163000  | 2.12573100  |
| H | -14.69391200 | -7.39654000  | 1.99021800  |
| H | -13.62656100 | -4.80954500  | -1.25982400 |
| H | -15.84823300 | -3.74418300  | -1.14873000 |
| C | -6.57351400  | -8.75378700  | -0.23928000 |
| N | -5.47755500  | -8.13191600  | -0.47818800 |
| C | -0.41311700  | -12.34026100 | -0.82594000 |
| C | -1.46710400  | -14.52694700 | -1.10384000 |
| C | -0.06752200  | -16.57469500 | -1.19008300 |
| H | -2.35781500  | -15.13594400 | -1.23136300 |
| H | 11.14567200  | -2.63423600  | 0.29146900  |
| C | 16.52936300  | 1.62413000   | 0.48193700  |
| H | -6.60071400  | -9.84432500  | -0.09980000 |
| C | -0.19254800  | -15.18092100 | -1.07954000 |
| C | -1.57166100  | -13.17504700 | -0.99096000 |
| C | -0.50154600  | -10.93162400 | -0.69921200 |
| C | -1.80318800  | -10.22385600 | -0.62912600 |
| C | -2.07334600  | -9.13715500  | -1.47736700 |
| C | -3.27858700  | -8.44930300  | -1.40094400 |
| C | -4.26972400  | -8.84484900  | -0.48885300 |
| C | -3.99051700  | -9.90628300  | 0.39080100  |
| C | -2.77650100  | -10.57905100 | 0.31960700  |
| H | -2.54542700  | -12.70400500 | -1.03991300 |

|   |              |              |             |
|---|--------------|--------------|-------------|
| H | -1.32954500  | -8.84299300  | -2.21165500 |
| H | -3.48926700  | -7.61449800  | -2.06108400 |
| H | -4.71274200  | -10.17391400 | 1.15554300  |
| H | -2.56468900  | -11.37986200 | 1.02094900  |
| C | -10.37966200 | -6.83141800  | 0.02501100  |
| C | -9.22364400  | -6.07510600  | -0.23956000 |
| C | -7.98068800  | -6.68507900  | -0.32601100 |
| C | -7.86602200  | -8.07468000  | -0.15231400 |
| C | -9.02258600  | -8.83080200  | 0.11081600  |
| C | -10.26427200 | -8.22096400  | 0.19947700  |
| H | -9.31162100  | -5.00025200  | -0.37531600 |
| H | -7.08212400  | -6.11296000  | -0.52852300 |
| H | -8.93477800  | -9.90591000  | 0.24459200  |
| H | -11.16317200 | -8.79205300  | 0.40258700  |
| C | -11.67999000 | -6.16494100  | 0.11359500  |
| N | -12.75596400 | -6.80748100  | 0.38402800  |
| C | 15.21764300  | 2.17656400   | 0.67113100  |
| C | 16.77940200  | 0.22783900   | 0.45392600  |
| C | 15.69638100  | -0.78286100  | 0.50563300  |
| C | 15.79181700  | -1.87210000  | 1.38978300  |
| C | 14.83252600  | -2.87518700  | 1.40059700  |
| C | 13.71957600  | -2.81032000  | 0.54660800  |
| C | 13.62034600  | -1.72992800  | -0.34838700 |
| C | 14.59659900  | -0.73921500  | -0.36819400 |
| H | 14.39056300  | 1.49932600   | 0.84612800  |
| H | 16.63210600  | -1.92312200  | 2.07534200  |
| H | 14.91295400  | -3.71962400  | 2.07710500  |
| H | 12.80368600  | -1.69933600  | -1.06287700 |
| H | 14.52797600  | 0.06474400   | -1.09403600 |
| C | 7.64450800   | -7.74075300  | 0.15273100  |
| N | 6.42662100   | -7.28726600  | 0.06022400  |
| C | 2.06582200   | -12.16836000 | -0.72363900 |
| C | 3.43173800   | -14.18638200 | -0.89783800 |
| C | 2.34072100   | -16.40715700 | -1.08887800 |
| H | 4.40554500   | -14.66578500 | -0.94628700 |
| H | -11.67589800 | -5.07769700  | -0.05188700 |
| C | -18.11061800 | -2.92440700  | 0.60437500  |
| H | 7.83633900   | -8.81218000  | 0.09552700  |
| C | 0.67501000   | -10.18232600 | -0.61101700 |
| C | 0.98200400   | -14.37841300 | -0.96045800 |
| H | 0.59523100   | -9.10723700  | -0.48322600 |
| C | 1.18670300   | -17.18001200 | -1.19103900 |
| C | 0.87765200   | -12.95774500 | -0.83390800 |
| H | 1.26545100   | -18.25943900 | -1.27754800 |

|    |              |              |             |
|----|--------------|--------------|-------------|
| C  | -19.00787700 | -5.18303100  | 0.54907200  |
| H  | -18.83686600 | -6.25415600  | 0.50693600  |
| C  | -19.44643100 | -2.41390400  | 0.58749200  |
| C  | 18.49994200  | 4.84728400   | 0.28695200  |
| C  | 19.82799400  | 4.31615500   | 0.18484700  |
| C  | 18.25633200  | 6.22818400   | 0.30030600  |
| H  | 20.65719700  | 5.01435900   | 0.11220900  |
| C  | 17.39250700  | 3.94944000   | 0.37963900  |
| C  | 16.96111500  | 6.72007600   | 0.37755700  |
| H  | 16.79050900  | 7.79170500   | 0.34865000  |
| C  | 20.04864900  | 2.97402600   | 0.18043400  |
| C  | 19.17349900  | 0.65849200   | 0.28597600  |
| H  | 21.05777000  | 2.57876200   | 0.10408700  |
| C  | 18.96136900  | 2.04446000   | 0.27980800  |
| C  | 18.10527800  | -0.22295000  | 0.36885000  |
| H  | 18.28818000  | -1.29236200  | 0.33746700  |
| C  | 17.62462600  | 2.53836900   | 0.37802700  |
| H  | -0.96646400  | -17.17811700 | -1.27910900 |
| H  | -1.26574900  | 19.00975100  | -0.64518800 |
| H  | -5.53753900  | 18.52377800  | -0.66921200 |
| H  | 19.09572500  | 6.91428000   | 0.23026600  |
| H  | 20.18812600  | 0.27801700   | 0.20823600  |
| H  | 3.31871400   | -16.87998000 | -1.09908300 |
| H  | -21.14688700 | -5.38305700  | 0.53029200  |
| H  | -22.25586700 | 1.25229200   | 0.61742300  |
| Ir | 6.22359700   | -5.19951500  | 0.10465100  |
| C  | 4.89633800   | -4.96443100  | 1.84366100  |
| C  | 5.93018200   | -3.96100800  | 1.88469300  |
| C  | 5.77301600   | -3.12228900  | 0.71346900  |
| C  | 4.58971100   | -3.58430300  | 0.01231800  |
| C  | 4.02855800   | -4.68936800  | 0.70700300  |
| C  | 2.76181300   | -5.41636500  | 0.38303300  |
| C  | 4.07839200   | -2.97536800  | -1.25403800 |
| C  | 6.53514600   | -1.87468400  | 0.39448200  |
| C  | 6.94404300   | -3.77064800  | 2.96851500  |
| C  | 4.65142700   | -6.03059800  | 2.86587900  |
| H  | 2.83016300   | -6.47626200  | 0.63671700  |
| H  | 2.52568300   | -5.35044800  | -0.68155900 |
| H  | 1.91513500   | -4.99323300  | 0.93867200  |
| H  | 3.45231400   | -2.10381800  | -1.02645800 |
| H  | 3.47408700   | -3.68492000  | -1.82332800 |
| H  | 4.91119900   | -2.65058200  | -1.87920300 |
| H  | 6.81590600   | -1.86610400  | -0.65981900 |
| H  | 7.44848900   | -1.81390500  | 0.99122000  |

|   |            |             |             |
|---|------------|-------------|-------------|
| H | 5.93616800 | -0.98339300 | 0.61970600  |
| H | 6.60165700 | -3.01481500 | 3.68524700  |
| H | 7.90274200 | -3.44370700 | 2.56083700  |
| H | 7.11948800 | -4.70034600 | 3.51369600  |
| H | 5.56865800 | -6.28107900 | 3.40290600  |
| H | 4.27592400 | -6.94465300 | 2.39937500  |
| H | 3.90808400 | -5.69763700 | 3.60017400  |
| O | 6.46664200 | -5.45794700 | -1.98108200 |
| C | 6.93066600 | -4.48089000 | -2.70043700 |
| O | 7.23772800 | -3.34698700 | -2.34774300 |
| H | 7.02682700 | -4.78642900 | -3.76283100 |

### TS1

|   |             |             |             |
|---|-------------|-------------|-------------|
| C | 22.13007300 | -1.44496900 | -0.40957700 |
| C | 21.25754600 | 0.87507800  | -0.42482800 |
| H | 23.14322600 | -1.05413600 | -0.37677900 |
| C | 21.04226200 | -0.51068600 | -0.43441400 |
| C | 20.57166700 | -3.31300600 | -0.47661800 |
| C | 21.90481200 | -2.78632300 | -0.42964000 |
| C | 20.32261400 | -4.69274300 | -0.50846600 |
| H | 22.73457300 | -3.48740800 | -0.41310600 |
| C | 1.62219400  | 14.13106500 | 0.50445200  |
| C | 0.65666000  | 16.37517700 | 0.50636200  |
| C | 2.14245600  | 18.36262000 | 0.47394800  |
| H | -0.21049400 | 17.02966600 | 0.52193800  |
| H | 13.21491000 | 3.95182500  | 0.14103600  |
| C | 18.60525000 | -0.08284100 | -0.49911100 |
| H | -4.64557400 | 11.62616700 | -0.30386100 |
| C | 4.40594000  | 16.69174000 | 0.55150600  |
| C | 5.39006300  | 14.46544000 | 0.63880400  |
| C | 3.91789800  | 12.44319900 | 0.56857300  |
| C | 5.05476500  | 11.49091700 | 0.55816300  |
| C | 5.09809600  | 10.43288800 | 1.48208800  |
| C | 6.11716000  | 9.49016200  | 1.44705200  |
| C | 7.15048800  | 9.59032800  | 0.50198700  |
| C | 7.10369700  | 10.63385100 | -0.43969000 |
| C | 6.06959500  | 11.56285400 | -0.41078300 |
| H | 6.26144400  | 13.82805200 | 0.72381500  |
| H | 4.32013400  | 10.35887000 | 2.23569700  |
| H | 6.14735500  | 8.67136500  | 2.15819000  |
| H | 7.85293800  | 10.68361400 | -1.22355600 |
| H | 6.02600800  | 12.34013100 | -1.16698300 |
| C | 12.48079500 | 5.99873800  | 0.01736200  |
| C | 11.16511400 | 5.60672000  | 0.32330700  |

|   |              |             |             |
|---|--------------|-------------|-------------|
| C | 10.14396700  | 6.54195400  | 0.39196200  |
| C | 10.41650100  | 7.89981900  | 0.15420800  |
| C | 11.73194900  | 8.29205600  | -0.15217300 |
| C | 12.75380900  | 7.35672500  | -0.21899600 |
| H | 10.95302000  | 4.55640700  | 0.50598300  |
| H | 9.12565400   | 6.25324300  | 0.62687900  |
| H | 11.94381300  | 9.34209000  | -0.33663800 |
| H | 13.77209200  | 7.64590500  | -0.45370600 |
| C | 13.53487400  | 4.98661900  | -0.04953100 |
| N | 14.75196700  | 5.27850400  | -0.32839400 |
| C | -14.99375600 | 3.52204800  | -0.77936900 |
| C | -15.84762900 | 5.87613500  | -0.67696200 |
| C | -14.49272700 | 6.47607600  | -0.69924000 |
| C | -14.17818700 | 7.49054600  | -1.61988500 |
| C | -12.94023900 | 8.11950800  | -1.60007500 |
| C | -11.95739100 | 7.73574900  | -0.67373100 |
| C | -12.26905200 | 6.73158500  | 0.26080500  |
| C | -13.51596700 | 6.11750000  | 0.24572700  |
| H | -13.98919300 | 3.88966600  | -0.95083700 |
| H | -14.91900400 | 7.78144900  | -2.35825100 |
| H | -12.70071800 | 8.90683400  | -2.30710700 |
| H | -11.55000000 | 6.47165800  | 1.03127600  |
| H | -13.75559100 | 5.37200000  | 0.99711700  |
| C | -4.61181100  | 10.55293100 | -0.06594500 |
| N | -3.52469900  | 9.97117500  | 0.28593000  |
| C | 4.09415600   | 13.84885000 | 0.56361200  |
| C | 5.53903400   | 15.81791400 | 0.62453800  |
| C | 4.54230700   | 18.08875300 | 0.53202800  |
| H | 6.52954000   | 16.26036200 | 0.68542500  |
| H | -9.61925900  | 6.75185500  | -0.14296500 |
| C | -16.06073000 | 4.47404600  | -0.65030400 |
| H | 9.66276500   | 9.94089100  | 0.00229600  |
| C | 1.95961500   | 16.97091400 | 0.49235500  |
| C | 0.49634500   | 15.02401600 | 0.52068500  |
| C | 1.47662100   | 12.72187600 | 0.51114100  |
| C | 0.15508800   | 12.05165200 | 0.44651700  |
| C | -0.17244700  | 11.04515000 | 1.37078900  |
| C | -1.38057400  | 10.36443100 | 1.29324800  |
| C | -2.32061400  | 10.68864800 | 0.30230100  |
| C | -1.98975300  | 11.67625600 | -0.64278700 |
| C | -0.77059100  | 12.34079200 | -0.56996100 |
| H | -0.49916700  | 14.59957600 | 0.56016900  |
| H | 0.53289100   | 10.80446100 | 2.16025700  |
| H | -1.63223700  | 9.58705500  | 2.00697100  |

|   |              |              |             |
|---|--------------|--------------|-------------|
| H | -2.67196400  | 11.88706500  | -1.46034700 |
| H | -0.51467700  | 13.07608500  | -1.32616400 |
| C | -8.36588200  | 8.52766900   | -0.31573500 |
| C | -7.20324000  | 7.82206200   | 0.04299000  |
| C | -5.97829200  | 8.46723100   | 0.12387400  |
| C | -5.88730200  | 9.84172400   | -0.15387000 |
| C | -7.04913500  | 10.54624400  | -0.51724400 |
| C | -8.27401200  | 9.90150300   | -0.59686800 |
| H | -7.27293700  | 6.75942500   | 0.26086700  |
| H | -5.07541600  | 7.93571100   | 0.40301700  |
| H | -6.97986600  | 11.60936300  | -0.73288800 |
| H | -9.17786200  | 10.43351000  | -0.87163300 |
| C | -9.64816700  | 7.82540800   | -0.37973500 |
| N | -10.73650800 | 8.42285300   | -0.69982300 |
| C | 17.28360100  | -0.62711700  | -0.63501900 |
| C | 18.86045700  | 1.31173400   | -0.45137300 |
| C | 17.76919400  | 2.31385200   | -0.41423800 |
| C | 17.77367300  | 3.40648300   | -1.29804800 |
| C | 16.78164300  | 4.37737400   | -1.24441100 |
| C | 15.72977600  | 4.27399300   | -0.32043000 |
| C | 15.73442600  | 3.19995400   | 0.58779400  |
| C | 16.73942600  | 2.24107800   | 0.53924800  |
| H | 16.45094800  | 0.05594300   | -0.75085200 |
| H | 18.56271300  | 3.48216800   | -2.03991200 |
| H | 16.78476200  | 5.21936800   | -1.92859600 |
| H | 14.97282700  | 3.14534500   | 1.35927000  |
| H | 16.74720600  | 1.43468000   | 1.26557900  |
| C | 9.35645600   | 8.90675600   | 0.21736900  |
| N | 8.14734500   | 8.60570400   | 0.51920500  |
| C | 3.42123500   | 18.91391100  | 0.48993400  |
| C | 2.93857100   | 14.69256300  | 0.52628000  |
| H | 3.54467300   | 19.99257300  | 0.47545000  |
| C | 2.62127800   | 11.92196400  | 0.55911900  |
| C | 3.10088700   | 16.11349300  | 0.52074600  |
| H | 2.49880000   | 10.84421300  | 0.52610900  |
| C | 19.70113000  | -1.00089900  | -0.47360000 |
| C | 20.18872100  | 1.76061800   | -0.43166200 |
| H | 20.37522300  | 2.82920800   | -0.38975200 |
| C | -2.28124100  | -15.02896900 | 0.30972400  |
| C | -3.34236300  | -12.83931000 | 0.41647300  |
| C | -1.93616400  | -10.76916100 | 0.42582300  |
| C | -3.11297900  | -9.86549800  | 0.41136600  |
| C | -3.26336100  | -8.87682000  | 1.39826300  |
| C | -4.34179200  | -7.99922300  | 1.38430200  |

|   |              |              |             |
|---|--------------|--------------|-------------|
| C | -5.30721400  | -8.10005600  | 0.37701700  |
| C | -5.16564800  | -9.06987000  | -0.62331300 |
| C | -4.07799900  | -9.93898000  | -0.60474200 |
| H | -4.23745700  | -12.23451100 | 0.49309200  |
| H | -2.53035800  | -8.81302000  | 2.19627600  |
| H | -4.45776200  | -7.24467800  | 2.15387200  |
| H | -5.89677500  | -9.11564000  | -1.42433900 |
| H | -3.96307300  | -10.67293300 | -1.39555800 |
| C | -10.57300900 | -4.69517000  | -0.06611300 |
| C | -9.20849400  | -4.37121400  | -0.01277900 |
| C | -8.23014100  | -5.36173000  | 0.07627500  |
| C | -8.68072900  | -6.70419100  | 0.16288900  |
| C | -10.04613300 | -7.04207900  | 0.12208700  |
| C | -10.98975100 | -6.04180200  | -0.00759100 |
| H | -8.92404900  | -3.32345500  | -0.00875300 |
| H | -10.35130200 | -8.08185900  | 0.20438900  |
| H | -12.05091800 | -6.25727900  | -0.04733900 |
| C | -11.55775500 | -3.61682000  | -0.16950900 |
| N | -12.80804800 | -3.84995600  | -0.33170200 |
| C | 17.05802100  | -1.96958600  | -0.65617700 |
| C | 17.91414600  | -4.32176200  | -0.53887400 |
| C | 16.55680000  | -4.91707800  | -0.52879500 |
| C | 16.21988200  | -5.93333300  | -1.43936700 |
| C | 14.97257200  | -6.54301500  | -1.40556300 |
| C | 14.00251800  | -6.13634900  | -0.47556900 |
| C | 14.33888900  | -5.13576900  | 0.45401900  |
| C | 15.59561400  | -4.54214000  | 0.42571600  |
| H | 16.04850600  | -2.33915100  | -0.78910000 |
| H | 16.94891400  | -6.23798400  | -2.18385800 |
| H | 14.71433600  | -7.32909000  | -2.10732700 |
| H | 13.62948500  | -4.86035100  | 1.22809400  |
| H | 15.85319300  | -3.79632200  | 1.17085500  |
| C | 6.58136300   | -8.76547900  | 0.02485200  |
| N | 5.49339600   | -8.16451100  | 0.34116800  |
| C | 0.41355300   | -12.37507700 | 0.37513600  |
| C | 1.45458000   | -14.58544800 | 0.35749700  |
| C | 0.03872400   | -16.62098400 | 0.25270700  |
| H | 2.34306900   | -15.21032900 | 0.38154300  |
| H | -11.15930500 | -2.59313300  | -0.11242900 |
| C | -16.53343600 | 1.63773300   | -0.53456600 |
| H | 6.60020400   | -9.83961400  | -0.21061900 |
| C | 0.17357900   | -15.22465000 | 0.30198100  |
| C | 1.56869300   | -13.23030900 | 0.40031100  |
| C | 0.51177000   | -10.96173300 | 0.41029700  |



|   |              |              |             |
|---|--------------|--------------|-------------|
| C | 1.81568700   | -10.25572100 | 0.37749000  |
| C | 2.11632800   | -9.26720200  | 1.32962300  |
| C | 3.32135600   | -8.57615500  | 1.29157700  |
| C | 4.28349600   | -8.87308400  | 0.31336700  |
| C | 3.97450000   | -9.83439000  | -0.66559800 |
| C | 2.75934900   | -10.50846300 | -0.63204400 |
| H | 2.54816600   | -12.77418000 | 0.47061800  |
| H | 1.39659800   | -9.05361800  | 2.11404700  |
| H | 3.55487000   | -7.81756700  | 2.03123200  |
| H | 4.67417300   | -10.01995900 | -1.47439100 |
| H | 2.52367300   | -11.22828000 | -1.40942400 |
| C | 10.38959900  | -6.83625000  | -0.14028700 |
| C | 9.23830100   | -6.09917600  | 0.19086900  |
| C | 7.99501800   | -6.71187800  | 0.24705200  |
| C | 7.87476100   | -8.08454000  | -0.02787600 |
| C | 9.02614200   | -8.82107600  | -0.36011700 |
| C | 10.26865200  | -8.20892600  | -0.41562500 |
| H | 9.33050500   | -5.03733200  | 0.40407200  |
| H | 7.10043300   | -6.15479300  | 0.50225200  |
| H | 8.93392700   | -9.88300500  | -0.57287500 |
| H | 11.16397700  | -8.76520000  | -0.66930200 |
| C | 11.69059900  | -6.16727100  | -0.19128000 |
| N | 12.76572900  | -6.79461300  | -0.49838400 |
| C | -15.21792600 | 2.17990000   | -0.72716600 |
| C | -16.78633900 | 0.24441200   | -0.44629400 |
| C | -15.70439300 | -0.76860900  | -0.43282400 |
| C | -15.78973700 | -1.90074500  | -1.26264500 |
| C | -14.83176700 | -2.90381900  | -1.21113700 |
| C | -13.72919300 | -2.79560900  | -0.34826400 |
| C | -13.64004500 | -1.67243300  | 0.49329500  |
| C | -14.61620100 | -0.68224100  | 0.45223900  |
| H | -14.38936900 | 1.49471700   | -0.85874100 |
| H | -16.62124000 | -1.98556200  | -1.95550600 |
| H | -14.90505700 | -3.78106400  | -1.84537700 |
| H | -12.83303800 | -1.60829500  | 1.21646900  |
| H | -14.55679200 | 0.15581100   | 1.13922300  |
| C | -7.62883800  | -7.66208400  | 0.32220900  |
| N | -6.40669200  | -7.20661900  | 0.33927800  |
| C | -2.06615800  | -12.17880800 | 0.38598600  |
| C | -3.44481300  | -14.19533400 | 0.37206800  |
| C | -2.36976200  | -16.42899900 | 0.26025500  |
| H | -4.42089100  | -14.67162000 | 0.40029700  |
| H | 11.68710400  | -5.09157700  | 0.03731600  |
| C | 18.12853400  | -2.91959100  | -0.54321200 |

|    |              |              |             |
|----|--------------|--------------|-------------|
| H  | -7.81332100  | -8.73026300  | 0.42925100  |
| C  | -0.66020900  | -10.20128800 | 0.45465400  |
| C  | -0.99634100  | -14.40700200 | 0.32067700  |
| H  | -0.57460200  | -9.11906900  | 0.45125500  |
| C  | -1.22061900  | -17.21508900 | 0.22852900  |
| C  | -0.88234800  | -12.98198000 | 0.35791300  |
| H  | -1.30699900  | -18.29670400 | 0.19081900  |
| C  | 19.02335400  | -5.17992600  | -0.53725800 |
| H  | 18.85084000  | -6.25161400  | -0.52735800 |
| C  | 19.46421000  | -2.41099000  | -0.49513500 |
| C  | -18.50103400 | 4.86864200   | -0.51785900 |
| C  | -19.83165000 | 4.34407600   | -0.41531900 |
| C  | -18.25450200 | 6.24735200   | -0.58762200 |
| H  | -20.66068900 | 5.04571000   | -0.38837600 |
| C  | -17.39390000 | 3.96630000   | -0.55136100 |
| C  | -16.95713800 | 6.73396800   | -0.66241500 |
| H  | -16.78506500 | 7.80566000   | -0.67639100 |
| C  | -20.05479400 | 3.00373400   | -0.35419900 |
| C  | -19.18214300 | 0.68489800   | -0.33855300 |
| H  | -21.06577400 | 2.61339600   | -0.27729900 |
| C  | -18.96768300 | 2.06947600   | -0.39263900 |
| C  | -18.11431100 | -0.20052700  | -0.36245600 |
| H  | -18.29979400 | -1.26704800  | -0.28393600 |
| C  | -17.62859000 | 2.55694700   | -0.49062000 |
| H  | 0.93419300   | -17.23581200 | 0.23770200  |
| H  | 1.26861000   | 19.00765300  | 0.45087300  |
| H  | 5.53904400   | 18.52030500  | 0.55428500  |
| H  | -19.09366300 | 6.93683400   | -0.56272100 |
| H  | -20.19855700 | 0.30940600   | -0.26013100 |
| H  | -3.35140200  | -16.89415800 | 0.25123300  |
| H  | 21.16186300  | -5.38238300  | -0.49379600 |
| H  | 22.27598100  | 1.25200200   | -0.39501800 |
| Ir | -6.21579200  | -5.11647100  | 0.22183700  |
| C  | -4.95465700  | -4.80076000  | -1.48392600 |
| C  | -5.91758100  | -3.70627600  | -1.38930800 |
| C  | -5.66724300  | -3.01923300  | -0.15399200 |
| C  | -4.48366800  | -3.62773900  | 0.45381200  |
| C  | -4.01472600  | -4.67474100  | -0.37452600 |
| C  | -2.79219100  | -5.51412900  | -0.18199000 |
| C  | -3.95855400  | -3.21199400  | 1.78790800  |
| C  | -6.36845500  | -1.81256100  | 0.38387200  |
| C  | -6.92823100  | -3.34830200  | -2.42982200 |
| C  | -4.80421900  | -5.74470400  | -2.63377000 |
| H  | -2.94886200  | -6.53802200  | -0.52624000 |

|   |             |             |             |
|---|-------------|-------------|-------------|
| H | -2.50109600 | -5.56383400 | 0.86883900  |
| H | -1.94895800 | -5.09608800 | -0.74581000 |
| H | -3.60030300 | -2.17682800 | 1.75090200  |
| H | -3.13607200 | -3.84964100 | 2.11682300  |
| H | -4.77623100 | -3.27228900 | 2.51528100  |
| H | -6.59570200 | -1.95720300 | 1.44143700  |
| H | -7.30858600 | -1.63645000 | -0.14368900 |
| H | -5.74819700 | -0.91535100 | 0.26620700  |
| H | -6.48008800 | -2.67386200 | -3.16921800 |
| H | -7.79199700 | -2.84612500 | -1.99275200 |
| H | -7.29095500 | -4.23557100 | -2.95220500 |
| H | -5.75822800 | -5.90025100 | -3.14143000 |
| H | -4.43917800 | -6.71729500 | -2.29521200 |
| H | -4.08822900 | -5.34910800 | -3.36456900 |
| O | -6.95124900 | -4.04995300 | 2.63438100  |
| C | -6.97546900 | -5.30376600 | 2.81269000  |
| O | -7.78541800 | -6.06795800 | 3.32538200  |
| H | -6.03345300 | -5.82223800 | 2.35288800  |

### IM3

|   |              |             |             |
|---|--------------|-------------|-------------|
| C | -22.01068500 | -1.23554200 | 0.41082100  |
| C | -21.10461900 | 1.07129700  | 0.45223700  |
| H | -23.01813200 | -0.82973800 | 0.38464600  |
| C | -20.90942200 | -0.31746200 | 0.44501400  |
| C | -20.47933500 | -3.12657900 | 0.45204600  |
| C | -21.80478700 | -2.58015300 | 0.41391900  |
| C | -20.25019700 | -4.51005000 | 0.46602400  |
| H | -22.64461800 | -3.26894000 | 0.39019000  |
| C | -1.29606700  | 14.06457500 | -0.49990200 |
| C | -0.30018100  | 16.29542000 | -0.49960300 |
| C | -1.75835200  | 18.30260000 | -0.44026000 |
| H | 0.57559800   | 16.93817100 | -0.52064600 |
| H | -13.02076300 | 4.03882400  | -0.10651500 |
| C | -18.46638500 | 0.07427500  | 0.51031400  |
| H | 4.94472500   | 11.46919000 | 0.22231100  |
| C | -4.04505000  | 16.66302100 | -0.50385900 |
| C | -5.06024500  | 14.45083700 | -0.59374400 |
| C | -3.61517800  | 12.40845900 | -0.55013000 |
| C | -4.76466300  | 11.47151200 | -0.53470400 |
| C | -4.83066100  | 10.42014300 | -1.46486900 |
| C | -5.86186300  | 9.49090000  | -1.42633300 |
| C | -6.88502500  | 9.59873500  | -0.47110700 |
| C | -6.81560800  | 10.63540700 | 0.47671100  |
| C | -5.76944200  | 11.55072000 | 0.44408800  |

|   |              |             |             |
|---|--------------|-------------|-------------|
| H | -5.94103800  | 13.82580800 | -0.67331600 |
| H | -4.06070300  | 10.34061400 | -2.22610200 |
| H | -5.90957500  | 8.67711000  | -2.14224100 |
| H | -7.55688400  | 10.69008600 | 1.26778800  |
| H | -5.70844700  | 12.32240100 | 1.20480200  |
| C | -12.25858000 | 6.07462900  | 0.02935000  |
| C | -10.95006400 | 5.66736800  | -0.28721400 |
| C | -9.91705300  | 6.58947500  | -0.35566100 |
| C | -10.17010800 | 7.94911900  | -0.10679900 |
| C | -11.47822200 | 8.35648600  | 0.21102200  |
| C | -12.51201700 | 7.43432200  | 0.27742300  |
| H | -10.75307300 | 4.61568400  | -0.47867800 |
| H | -8.90416300  | 6.28901900  | -0.59912800 |
| H | -11.67496200 | 9.40787700  | 0.40431300  |
| H | -13.52495400 | 7.73527000  | 0.52033800  |
| C | -13.32588100 | 5.07629600  | 0.09356100  |
| N | -14.53780000 | 5.38239200  | 0.37964600  |
| C | 15.17747900  | 3.21480900  | 0.64375500  |
| C | 16.06413600  | 5.55521200  | 0.50649600  |
| C | 14.71850100  | 6.17554700  | 0.53474000  |
| C | 14.42915900  | 7.20445600  | 1.44763900  |
| C | 13.20076600  | 7.85189700  | 1.43429300  |
| C | 12.20216200  | 7.47309200  | 0.52292300  |
| C | 12.48850800  | 6.45444600  | -0.40398500 |
| C | 13.72628000  | 5.82182700  | -0.39577800 |
| H | 14.17890200  | 3.59874100  | 0.81437800  |
| H | 15.18216000  | 7.49172400  | 2.17499500  |
| H | 12.98073500  | 8.65010700  | 2.13541800  |
| H | 11.75693700  | 6.19702400  | -1.16346300 |
| H | 13.94648300  | 5.06466200  | -1.14144700 |
| C | 4.89261300   | 10.39614400 | -0.01317000 |
| N | 3.79308100   | 9.82993200  | -0.35150900 |
| C | -3.77216600  | 13.81631300 | -0.53539800 |
| C | -5.19063800  | 15.80509700 | -0.57016300 |
| C | -4.16217400  | 18.06161800 | -0.47494300 |
| H | -6.17560200  | 16.26128400 | -0.61819300 |
| H | 9.84264600   | 6.51930000  | 0.03017400  |
| C | 16.25709300  | 4.14995700  | 0.49677200  |
| H | -9.38813600  | 9.97896300  | 0.05382700  |
| C | -1.59467900  | 16.90867300 | -0.46853400 |
| C | -0.15843700  | 14.94230900 | -0.52311900 |
| C | -1.16980400  | 12.65356400 | -0.51545700 |
| C | 0.14277900   | 11.96468200 | -0.46740000 |
| C | 0.44561000   | 10.95618000 | -1.39797100 |

|   |              |             |             |
|---|--------------|-------------|-------------|
| C | 1.64428100   | 10.25749300 | -1.33537500 |
| C | 2.59966300   | 10.56516300 | -0.35388300 |
| C | 2.29374400   | 11.55500800 | 0.59721200  |
| C | 1.08363400   | 12.23736700 | 0.53965100  |
| H | 0.83074700   | 14.50468800 | -0.57547800 |
| H | -0.27173300  | 10.72804700 | -2.18031600 |
| H | 1.87654000   | 9.47833300  | -2.05372100 |
| H | 2.98787900   | 11.75329800 | 1.40783300  |
| H | 0.84669300   | 12.97382800 | 1.30086300  |
| C | 8.61870200   | 8.31591200  | 0.20130100  |
| C | 7.44092500   | 7.62554600  | -0.13706700 |
| C | 6.22494700   | 8.28876400  | -0.20699800 |
| C | 6.15840000   | 9.66637600  | 0.06205300  |
| C | 7.33539500   | 10.35566900 | 0.40523000  |
| C | 8.55134600   | 9.69300000  | 0.47333000  |
| H | 7.49149700   | 6.56023900  | -0.34705200 |
| H | 5.31045700   | 7.76896100  | -0.46994500 |
| H | 7.28495300   | 11.42111100 | 0.61452800  |
| H | 9.46662900   | 10.21304100 | 0.73271000  |
| C | 9.89089500   | 7.59464500  | 0.25543400  |
| N | 10.99206200  | 8.17865600  | 0.55567700  |
| C | -17.15260700 | -0.49058600 | 0.63828400  |
| C | -18.70141200 | 1.47284200  | 0.47860600  |
| C | -17.59579800 | 2.45930200  | 0.44864700  |
| C | -17.58225500 | 3.54368100  | 1.34248000  |
| C | -16.57679900 | 4.50099300  | 1.29472000  |
| C | -15.52925300 | 4.39139500  | 0.36655100  |
| C | -15.55151000 | 3.32569600  | -0.55119400 |
| C | -16.56972300 | 2.38064300  | -0.50835800 |
| H | -16.31007400 | 0.17897300  | 0.76135400  |
| H | -18.36805600 | 3.62370800  | 2.08732200  |
| H | -16.56614500 | 5.33667600  | 1.98652800  |
| H | -14.79300700 | 3.26745300  | -1.32544600 |
| H | -16.59092200 | 1.58108600  | -1.24194000 |
| C | -9.09738900  | 8.94245500  | -0.17124400 |
| N | -7.89505400  | 8.62764400  | -0.48582300 |
| C | -3.02960500  | 18.87125200 | -0.43975500 |
| C | -2.60484200  | 14.64400500 | -0.50511100 |
| H | -3.13820200  | 19.95138300 | -0.41773400 |
| C | -2.32577400  | 11.86963900 | -0.55625500 |
| C | -2.74773700  | 16.06696000 | -0.48991700 |
| H | -2.21779200  | 10.79016200 | -0.53008800 |
| C | -19.57546400 | -0.82748100 | 0.47596100  |
| C | -20.02305900 | 1.94113400  | 0.46693100  |

|   |              |              |             |
|---|--------------|--------------|-------------|
| H | -20.19413000 | 3.01272200   | 0.43743100  |
| C | 2.19609900   | -15.15583900 | -0.54074500 |
| C | 3.29486700   | -12.98218800 | -0.55177400 |
| C | 1.92520900   | -10.88852000 | -0.50040700 |
| C | 3.11778900   | -10.00774100 | -0.44145500 |
| C | 3.29396100   | -8.98416400  | -1.38818500 |
| C | 4.38913500   | -8.13030700  | -1.33136600 |
| C | 5.34850300   | -8.29146400  | -0.32551500 |
| C | 5.17735600   | -9.29241500  | 0.63938500  |
| C | 4.07176100   | -10.13655900 | 0.57975000  |
| H | 4.20043300   | -12.38971300 | -0.59257000 |
| H | 2.56519700   | -8.87247800  | -2.18508300 |
| H | 4.52886100   | -7.33544400  | -2.05530400 |
| H | 5.89689500   | -9.38220400  | 1.44685100  |
| H | 3.93227900   | -10.89343600 | 1.34473400  |
| C | 10.65434800  | -4.97519300  | 0.05862100  |
| C | 9.30346500   | -4.64068100  | -0.10376200 |
| C | 8.29801100   | -5.61869200  | -0.16384000 |
| C | 8.73850400   | -6.97474000  | -0.08544200 |
| C | 10.09837300  | -7.32107100  | 0.05884400  |
| C | 11.05328900  | -6.32965000  | 0.14139800  |
| H | 9.03870000   | -3.59075300  | -0.19615700 |
| H | 10.38654900  | -8.36858600  | 0.10763500  |
| H | 12.10650300  | -6.55366000  | 0.26211100  |
| C | 11.64858700  | -3.90469900  | 0.13244000  |
| N | 12.89486800  | -4.13983300  | 0.32590200  |
| C | -16.94645200 | -1.83633200  | 0.64344600  |
| C | -17.83645400 | -4.17439500  | 0.49775000  |
| C | -16.48800300 | -4.78939000  | 0.47910200  |
| C | -16.16684700 | -5.82395600  | 1.37472700  |
| C | -14.92882600 | -6.45168900  | 1.33262200  |
| C | -13.95196400 | -6.04557700  | 0.40951000  |
| C | -14.27257100 | -5.02632000  | -0.50516200 |
| C | -15.52055100 | -4.41474800  | -0.46911700 |
| H | -15.94230100 | -2.22195000  | 0.77119200  |
| H | -16.90081700 | -6.12862000  | 2.11435200  |
| H | -14.68300300 | -7.25185400  | 2.02282400  |
| H | -13.55806500 | -4.74993100  | -1.27419600 |
| H | -15.76630600 | -3.65435300  | -1.20344100 |
| C | -6.56579200  | -8.76683100  | -0.11739300 |
| N | -5.46692900  | -8.17262200  | -0.40760900 |
| C | -0.45250600  | -12.45510600 | -0.53832900 |
| C | -1.53090200  | -14.64632400 | -0.61705000 |
| C | -0.15092500  | -16.70864100 | -0.57237900 |

|   |              |              |             |
|---|--------------|--------------|-------------|
| H | -2.42947600  | -15.25436800 | -0.67516800 |
| H | 11.26109800  | -2.88012700  | 0.02680200  |
| C | 16.69003600  | 1.30598000   | 0.42158400  |
| H | -6.60197200  | -9.84670600  | 0.08770400  |
| C | -0.26164900  | -15.30927900 | -0.57043100 |
| C | -1.62141600  | -13.28872600 | -0.60975600 |
| C | -0.52588100  | -11.03993100 | -0.52107000 |
| C | -1.81861200  | -10.31421600 | -0.47645300 |
| C | -2.09348400  | -9.28725000  | -1.39496800 |
| C | -3.28900700  | -8.58048200  | -1.34558000 |
| C | -4.26700500  | -8.89858300  | -0.39009000 |
| C | -3.98304000  | -9.89847700  | 0.55735100  |
| C | -2.77750500  | -10.58877100 | 0.51292100  |
| H | -2.59218900  | -12.81342200 | -0.67405800 |
| H | -1.36086800  | -9.05537900  | -2.16205700 |
| H | -3.50277800  | -7.79193500  | -2.05943200 |
| H | -4.69411500  | -10.10229900 | 1.35166900  |
| H | -2.56097300  | -11.33926500 | 1.26646300  |
| C | -10.34809100 | -6.78906100  | 0.07259700  |
| C | -9.18451000  | -6.06002600  | -0.23239900 |
| C | -7.94940800  | -6.68839500  | -0.29609200 |
| C | -7.85000200  | -8.06923500  | -0.05595400 |
| C | -9.01377900  | -8.79781400  | 0.24959600  |
| C | -10.24799500 | -8.16990400  | 0.31325300  |
| H | -9.26052100  | -4.99183800  | -0.41866200 |
| H | -7.04534000  | -6.13753900  | -0.53055700 |
| H | -8.93768100  | -9.86604200  | 0.43549300  |
| H | -11.15253200 | -8.71991400  | 0.54717300  |
| C | -11.63991300 | -6.10345900  | 0.13337100  |
| N | -12.72500500 | -6.72211900  | 0.42263600  |
| C | 15.38273100  | 1.86902000   | 0.60981300  |
| C | 16.92312700  | -0.09196600  | 0.35706100  |
| C | 15.82700600  | -1.08979900  | 0.36559100  |
| C | 15.89363900  | -2.20193600  | 1.22343400  |
| C | 14.92201900  | -3.19265000  | 1.19289900  |
| C | 13.82536500  | -3.09415400  | 0.32087700  |
| C | 13.75587300  | -1.99032300  | -0.54809100 |
| C | 14.74335200  | -1.01068500  | -0.52542900 |
| H | 14.54552000  | 1.19693300   | 0.75405200  |
| H | 16.72124100  | -2.28062300  | 1.92175600  |
| H | 14.98010500  | -4.05433200  | 1.84963900  |
| H | 12.95272500  | -1.93219800  | -1.27610900 |
| H | 14.69700700  | -0.18750900  | -1.23137500 |
| C | 7.67637300   | -7.92255600  | -0.16610600 |

|    |              |              |             |
|----|--------------|--------------|-------------|
| N  | 6.46825500   | -7.42806900  | -0.28099600 |
| C  | 2.02978100   | -12.30107100 | -0.51216200 |
| C  | 3.37413000   | -14.34048000 | -0.55714100 |
| C  | 2.26036100   | -16.55809700 | -0.54298400 |
| H  | 4.34242500   | -14.83220300 | -0.59034700 |
| H  | -11.62083100 | -5.02305600  | -0.07117300 |
| C  | -18.03062700 | -2.76941200  | 0.52001600  |
| H  | 7.82969200   | -9.00058100  | -0.16468200 |
| C  | 0.65902400   | -10.29841100 | -0.52272000 |
| C  | 0.92203500   | -14.51173900 | -0.54395900 |
| H  | 0.59200000   | -9.21581600  | -0.47854400 |
| C  | 1.09785500   | -17.32486100 | -0.55513300 |
| C  | 0.83259600   | -13.08445100 | -0.52860700 |
| H  | 1.16555700   | -18.40851000 | -0.55694000 |
| C  | -18.95809300 | -5.01624900  | 0.48663000  |
| H  | -18.80116300 | -6.09010600  | 0.46281400  |
| C  | -19.35889600 | -2.24100700  | 0.48004400  |
| C  | 18.70209800  | 4.50834700   | 0.34463100  |
| C  | 20.02475200  | 3.96369600   | 0.24351700  |
| C  | 18.47536300  | 5.89124800   | 0.39534300  |
| H  | 20.86326400  | 4.65322400   | 0.20124700  |
| C  | 17.58261200  | 3.62226800   | 0.39769700  |
| C  | 17.18549200  | 6.39696800   | 0.47214700  |
| H  | 17.02852800  | 7.47107300   | 0.47308500  |
| C  | 20.22902000  | 2.61956600   | 0.20353500  |
| C  | 19.32432600  | 0.31313200   | 0.23267700  |
| H  | 21.23414800  | 2.21397900   | 0.12863000  |
| C  | 19.12929600  | 1.70129600   | 0.26278100  |
| C  | 18.24440300  | -0.55683900  | 0.27681000  |
| H  | 18.41449700  | -1.62722000  | 0.21813700  |
| C  | 17.79753500  | 2.20902200   | 0.35802800  |
| H  | -1.05677600  | -17.30800600 | -0.59143300 |
| H  | -0.87561100  | 18.93558200  | -0.42256000 |
| H  | -5.15312300  | 18.50676200  | -0.48431300 |
| H  | 19.32390900  | 6.56843100   | 0.35534300  |
| H  | 20.33519800  | -0.07775400  | 0.15758800  |
| H  | 3.23390000   | -17.04013400 | -0.53898100 |
| H  | -21.09934600 | -5.18726900  | 0.44387800  |
| H  | -22.11754700 | 1.46322500   | 0.42891100  |
| Ir | 6.30680700   | -5.36112300  | -0.31881300 |
| C  | 4.91940700   | -4.83189800  | 1.47033300  |
| C  | 5.94019000   | -3.84471100  | 1.34321200  |
| C  | 5.81509300   | -3.23712800  | 0.02962700  |
| C  | 4.63758100   | -3.81176400  | -0.59846400 |



|   |            |             |             |
|---|------------|-------------|-------------|
| C | 4.09773800 | -4.79576400 | 0.27116900  |
| C | 2.83827000 | -5.58013500 | 0.07417900  |
| C | 4.06966400 | -3.37919600 | -1.91531100 |
| C | 6.55513900 | -2.02575800 | -0.44965000 |
| C | 6.95789300 | -3.46678000 | 2.37389800  |
| C | 4.66089700 | -5.72238800 | 2.64715100  |
| H | 2.92637100 | -6.59163700 | 0.47630900  |
| H | 2.58221900 | -5.67038500 | -0.98363600 |
| H | 1.99548700 | -5.09226700 | 0.58093600  |
| H | 3.39322700 | -2.52556000 | -1.78046700 |
| H | 3.50384100 | -4.18341600 | -2.39069300 |
| H | 4.86042700 | -3.07499700 | -2.60388900 |
| H | 6.66156200 | -2.02980600 | -1.53700000 |
| H | 7.55822800 | -1.97914900 | -0.01887400 |
| H | 6.03301800 | -1.10280800 | -0.16448200 |
| H | 6.66009400 | -2.54857600 | 2.89504300  |
| H | 7.93763700 | -3.29336100 | 1.92218500  |
| H | 7.07823800 | -4.25384300 | 3.12130600  |
| H | 5.54678200 | -5.81454300 | 3.27915900  |
| H | 4.37637800 | -6.72795100 | 2.32407500  |
| H | 3.84455900 | -5.33156800 | 3.26793200  |
| H | 6.61716400 | -5.45450300 | -1.87905300 |

**IM-3 + H<sub>2</sub>O**

|   |              |             |             |
|---|--------------|-------------|-------------|
| C | -22.06323400 | -1.27466000 | 0.50987700  |
| C | -21.16304000 | 1.03475600  | 0.52681900  |
| H | -23.07183100 | -0.87168100 | 0.48433400  |
| C | -20.96423300 | -0.35349500 | 0.53122400  |
| C | -20.52681000 | -3.16129600 | 0.56144200  |
| C | -21.85383400 | -2.61865500 | 0.52413100  |
| C | -20.29402300 | -4.54399900 | 0.58664900  |
| H | -22.69195600 | -3.30978500 | 0.51012300  |
| C | -1.40002200  | 14.08429400 | -0.57034000 |
| C | -0.41229500  | 16.31861300 | -0.59365600 |
| C | -1.87814300  | 18.32094200 | -0.56847100 |
| H | 0.46122200   | 16.96430500 | -0.61832500 |
| H | -13.08935300 | 4.02112700  | -0.08478600 |
| C | -18.52195800 | 0.04513900  | 0.58291000  |
| H | 4.84517300   | 11.52020600 | 0.23281300  |
| C | -4.15845800  | 16.67212600 | -0.62236200 |
| C | -5.16501400  | 14.45513400 | -0.68819200 |
| C | -3.71261800  | 12.41896400 | -0.61070500 |
| C | -4.85882800  | 11.47816700 | -0.58756500 |
| C | -4.91777000  | 10.41442700 | -1.50400700 |

|   |              |             |             |
|---|--------------|-------------|-------------|
| C | -5.94589200  | 9.48213100  | -1.45685500 |
| C | -6.97275300  | 9.59880700  | -0.50664800 |
| C | -6.91031500  | 10.64811300 | 0.42768300  |
| C | -5.86737600  | 11.56671000 | 0.38655200  |
| H | -6.04307000  | 13.82577400 | -0.76387100 |
| H | -4.14475400  | 10.32753900 | -2.26132400 |
| H | -5.98818500  | 8.65880600  | -2.16212100 |
| H | -7.65441900  | 10.71052600 | 1.21552300  |
| H | -5.81180100  | 12.34862700 | 1.13716700  |
| C | -12.33401900 | 6.06094300  | 0.02890100  |
| C | -11.02416600 | 5.65500800  | -0.28381100 |
| C | -9.99449600  | 6.58004500  | -0.36260800 |
| C | -10.25242100 | 7.94141600  | -0.12861200 |
| C | -11.56198100 | 8.34752200  | 0.18484800  |
| C | -12.59235000 | 7.42237800  | 0.26192300  |
| H | -10.82339400 | 4.60201000  | -0.46378300 |
| H | -8.98055400  | 6.28058600  | -0.60290700 |
| H | -11.76250700 | 9.40026900  | 0.36651900  |
| H | -13.60627400 | 7.72229000  | 0.50197800  |
| C | -13.39764600 | 5.05954200  | 0.10532000  |
| N | -14.60998600 | 5.36433200  | 0.39100400  |
| C | 15.08613000  | 3.29554100  | 0.82833500  |
| C | 15.97396100  | 5.63640400  | 0.70986400  |
| C | 14.62752400  | 6.25561900  | 0.71252700  |
| C | 14.31991600  | 7.28368500  | 1.62039400  |
| C | 13.09085000  | 7.92898000  | 1.58494300  |
| C | 12.10964100  | 7.54866000  | 0.65546500  |
| C | 12.41469600  | 6.53129500  | -0.26681300 |
| C | 13.65330700  | 5.90092400  | -0.23640900 |
| H | 14.08423100  | 3.67882900  | 0.97971500  |
| H | 15.05889600  | 7.57175200  | 2.36169400  |
| H | 12.85662700  | 8.72635700  | 2.28240500  |
| H | 11.69736900  | 6.27288500  | -1.03941300 |
| H | 13.88831900  | 5.14463200  | -0.97843300 |
| C | 4.79877200   | 10.44507200 | 0.00578700  |
| N | 3.70426000   | 9.87215600  | -0.33746700 |
| C | -3.87489700  | 13.82628500 | -0.61516600 |
| C | -5.30052200  | 15.80909100 | -0.68312000 |
| C | -4.28086600  | 18.07053500 | -0.61243800 |
| H | -6.28690900  | 16.26090500 | -0.74208000 |
| H | 9.76175000   | 6.58649200  | 0.12880600  |
| C | 16.16795300  | 4.23126700  | 0.70322300  |
| H | -9.47839100  | 9.97590000  | 0.00872900  |
| C | -1.70919300  | 16.92738700 | -0.57758600 |

|   |              |             |             |
|---|--------------|-------------|-------------|
| C | -0.26547000  | 14.96584900 | -0.59873600 |
| C | -1.26846000  | 12.67371200 | -0.56711300 |
| C | 0.04654600   | 11.99076900 | -0.50280900 |
| C | 0.35984000   | 10.97316400 | -1.41984800 |
| C | 1.56097700   | 10.28030600 | -1.34117500 |
| C | 2.50817800   | 10.60277500 | -0.35649600 |
| C | 2.19157500   | 11.60194900 | 0.58130200  |
| C | 0.97927800   | 12.27877600 | 0.50751400  |
| H | 0.72556100   | 14.53119700 | -0.63989100 |
| H | -0.35121600  | 10.73314700 | -2.20437900 |
| H | 1.80142900   | 9.49406900  | -2.04902900 |
| H | 2.87904200   | 11.81214400 | 1.39459500  |
| H | 0.73406000   | 13.02294400 | 1.25855600  |
| C | 8.52920500   | 8.37939600  | 0.27601300  |
| C | 7.35828600   | 7.68311500  | -0.07383200 |
| C | 6.14092100   | 8.34162100  | -0.16207800 |
| C | 6.06624500   | 9.72034200  | 0.09906100  |
| C | 7.23654400   | 10.41572400 | 0.45272800  |
| C | 8.45377400   | 9.75767000  | 0.53976600  |
| H | 7.41516100   | 6.61698500  | -0.27786600 |
| H | 5.23160800   | 7.81712900  | -0.43349700 |
| H | 7.17979200   | 11.48209400 | 0.65560400  |
| H | 9.36388300   | 10.28225100 | 0.80806300  |
| C | 9.80287800   | 7.66268100  | 0.35134400  |
| N | 10.89739600  | 8.25115700  | 0.66692400  |
| C | -17.20620000 | -0.51523500 | 0.71028800  |
| C | -18.76077400 | 1.44277500  | 0.53988300  |
| C | -17.65808900 | 2.43204900  | 0.49714700  |
| C | -17.64505500 | 3.52464600  | 1.38095600  |
| C | -16.64292600 | 4.48472100  | 1.32102700  |
| C | -15.59807100 | 4.36993000  | 0.39044700  |
| C | -15.61976900 | 3.29566100  | -0.51724100 |
| C | -16.63485200 | 2.34781300  | -0.46241200 |
| H | -16.36489900 | 0.15751500  | 0.82400400  |
| H | -18.42864300 | 3.60902200  | 2.12764400  |
| H | -16.63276400 | 5.32682200  | 2.00501500  |
| H | -14.86350600 | 3.23268500  | -1.29331700 |
| H | -16.65587300 | 1.54152700  | -1.18859500 |
| C | -9.18330300  | 8.93789900  | -0.20341900 |
| N | -7.97919300  | 8.62386700  | -0.51193000 |
| C | -3.15146700  | 18.88478400 | -0.58205700 |
| C | -2.71084200  | 14.65870600 | -0.58986700 |
| H | -3.26414100  | 19.96470000 | -0.57481600 |
| C | -2.42122700  | 11.88489600 | -0.60370100 |

|   |              |              |             |
|---|--------------|--------------|-------------|
| C | -2.85904400  | 16.08118100  | -0.59397500 |
| H | -2.30932000  | 10.80625800  | -0.56312500 |
| C | -19.62882200 | -0.85975000  | 0.56112700  |
| C | -20.08372000 | 1.90746700   | 0.52934900  |
| H | -20.25774400 | 2.97829400   | 0.49099400  |
| C | 2.18326000   | -15.13436900 | -0.49245700 |
| C | 3.27083500   | -12.95545200 | -0.53162000 |
| C | 1.89072200   | -10.86818900 | -0.48205000 |
| C | 3.07817000   | -9.98000400  | -0.43984400 |
| C | 3.23471400   | -8.95572100  | -1.38906000 |
| C | 4.32477300   | -8.09359500  | -1.34766500 |
| C | 5.29724800   | -8.24510500  | -0.35320700 |
| C | 5.14537400   | -9.24716700  | 0.61447200  |
| C | 4.04716600   | -10.10068600 | 0.56861300  |
| H | 4.17318900   | -12.35927500 | -0.58707300 |
| H | 2.49662800   | -8.85041800  | -2.17810500 |
| H | 4.45183300   | -7.30415400  | -2.07908100 |
| H | 5.87035900   | -9.32733700  | 1.41798500  |
| H | 3.92284000   | -10.85647800 | 1.33715900  |
| C | 10.58244900  | -4.89744200  | 0.11240000  |
| C | 9.23796200   | -4.56602300  | -0.10923000 |
| C | 8.23541100   | -5.54570300  | -0.20627100 |
| C | 8.67426000   | -6.89817900  | -0.07776300 |
| C | 10.02701700  | -7.24173900  | 0.12532100  |
| C | 10.97953700  | -6.24918300  | 0.22591000  |
| H | 8.97758200   | -3.51698600  | -0.20859500 |
| H | 10.31194000  | -8.28815500  | 0.20553400  |
| H | 12.02742100  | -6.47093700  | 0.38919100  |
| C | 11.57154100  | -3.82315900  | 0.21262100  |
| N | 12.81165500  | -4.05654300  | 0.44236500  |
| C | -16.99651100 | -1.86035900  | 0.72618400  |
| C | -17.88106000 | -4.20188000  | 0.60454900  |
| C | -16.53115800 | -4.81361300  | 0.58433800  |
| C | -16.20280600 | -5.83999300  | 1.48674600  |
| C | -14.96362600 | -6.46535000  | 1.44306000  |
| C | -13.99275000 | -6.06480700  | 0.51124700  |
| C | -14.32055200 | -5.05371800  | -0.40993100 |
| C | -15.56964300 | -4.44457600  | -0.37209200 |
| H | -15.99081100 | -2.24226900  | 0.85293000  |
| H | -16.93208800 | -6.14019800  | 2.23280100  |
| H | -14.71229900 | -7.25929100  | 2.13845000  |
| H | -13.61092800 | -4.78214200  | -1.18517000 |
| H | -15.82109700 | -3.69081600  | -1.11130400 |
| C | -6.60500100  | -8.77623300  | -0.04433200 |

|   |              |              |             |
|---|--------------|--------------|-------------|
| N | -5.50993200  | -8.18193400  | -0.34832800 |
| C | -0.47893700  | -12.44704900 | -0.48612000 |
| C | -1.54679100  | -14.64414100 | -0.53680000 |
| C | -0.15597200  | -16.69898900 | -0.48881300 |
| H | -2.44273200  | -15.25716500 | -0.58141800 |
| H | 11.18508000  | -2.79996700  | 0.09128600  |
| C | 16.60352100  | 1.38766500   | 0.63335600  |
| H | -6.63711000  | -9.85451400  | 0.16972800  |
| C | -0.27377200  | -15.30023400 | -0.49699800 |
| C | -1.64420200  | -13.28700900 | -0.53970800 |
| C | -0.55970600  | -11.03219000 | -0.47978500 |
| C | -1.85543100  | -10.31210100 | -0.43058500 |
| C | -2.14179600  | -9.29402900  | -1.35549500 |
| C | -3.33934900  | -8.59112600  | -1.30189800 |
| C | -4.30799000  | -8.90444500  | -0.33533100 |
| C | -4.01264300  | -9.89562000  | 0.61777200  |
| C | -2.80503400  | -10.58208500 | 0.56891200  |
| H | -2.61788100  | -12.81702400 | -0.59867000 |
| H | -1.41659600  | -9.06593600  | -2.13072100 |
| H | -3.56187300  | -7.80924800  | -2.02037400 |
| H | -4.71635100  | -10.09536100 | 1.41964900  |
| H | -2.57954200  | -11.32547100 | 1.32687600  |
| C | -10.38962600 | -6.80424300  | 0.15781700  |
| C | -9.22974600  | -6.07559400  | -0.16182600 |
| C | -7.99395600  | -6.70215300  | -0.22939400 |
| C | -7.89011300  | -8.08074100  | 0.02159500  |
| C | -9.05012000  | -8.80890000  | 0.34209000  |
| C | -10.28506400 | -8.18278100  | 0.40955300  |
| H | -9.30922100  | -5.00919700  | -0.35667100 |
| H | -7.09277200  | -6.15162000  | -0.47541100 |
| H | -8.97059500  | -9.87538400  | 0.53639300  |
| H | -11.18680300 | -8.73249600  | 0.65469700  |
| C | -11.68235900 | -6.12058400  | 0.22139500  |
| N | -12.76436400 | -6.73882400  | 0.52283500  |
| C | 15.29252800  | 1.94989300   | 0.79681700  |
| C | 16.83876700  | -0.00998500  | 0.57091900  |
| C | 15.74289000  | -1.00789700  | 0.55362400  |
| C | 15.79190000  | -2.12350800  | 1.40805200  |
| C | 14.82111400  | -3.11408000  | 1.35315000  |
| C | 13.74254600  | -3.01087200  | 0.45965100  |
| C | 13.69062300  | -1.90351900  | -0.40597900 |
| C | 14.67770200  | -0.92465000  | -0.35925000 |
| H | 14.45270600  | 1.27764600   | 0.92410400  |
| H | 16.60504400  | -2.20528700  | 2.12272900  |

|    |              |              |             |
|----|--------------|--------------|-------------|
| H  | 14.86562500  | -3.97869800  | 2.00706400  |
| H  | 12.90291500  | -1.84122000  | -1.15032200 |
| H  | 14.64606700  | -0.09870000  | -1.06262800 |
| C  | 7.61731800   | -7.85158200  | -0.16057200 |
| N  | 6.40962500   | -7.37160000  | -0.32049300 |
| C  | 2.00285800   | -12.28026100 | -0.48423600 |
| C  | 3.35688800   | -14.31334900 | -0.52724200 |
| C  | 2.25465400   | -16.53625300 | -0.48421300 |
| H  | 4.32726200   | -14.80046400 | -0.56678500 |
| H  | -11.66667500 | -5.04195500  | 0.00748000  |
| C  | -18.07877300 | -2.79725800  | 0.61554400  |
| H  | 7.77702900   | -8.92785900  | -0.11880200 |
| C  | 0.62126200   | -10.28483400 | -0.49776100 |
| C  | 0.90604300   | -14.49661500 | -0.48828700 |
| H  | 0.54849000   | -9.20234000  | -0.46156900 |
| C  | 1.09599300   | -17.30887100 | -0.47883100 |
| C  | 0.80949800   | -13.06972600 | -0.48330300 |
| H  | 1.16912900   | -18.39213500 | -0.47270200 |
| C  | -19.00053200 | -5.04668400  | 0.60589000  |
| H  | -18.84092000 | -6.12030100  | 0.59064900  |
| C  | -19.40856900 | -2.27262800  | 0.57676900  |
| C  | 18.61523200  | 4.59084800   | 0.59965000  |
| C  | 19.93987500  | 4.04685800   | 0.52440800  |
| C  | 18.38679700  | 5.97359100   | 0.64658400  |
| H  | 20.77873600  | 4.73679600   | 0.49934800  |
| C  | 17.49537100  | 3.70425800   | 0.62992200  |
| C  | 17.09539400  | 6.47867500   | 0.69801300  |
| H  | 16.93792700  | 7.55269000   | 0.69631200  |
| C  | 20.14562500  | 2.70287300   | 0.48727400  |
| C  | 19.24165700  | 0.39601000   | 0.49554500  |
| H  | 21.15222800  | 2.29784400   | 0.43189300  |
| C  | 19.04533500  | 1.78405500   | 0.52365900  |
| C  | 18.16145700  | -0.47447100  | 0.51663000  |
| H  | 18.33324800  | -1.54466900  | 0.45929800  |
| C  | 17.71171900  | 2.29117200   | 0.59310400  |
| H  | -1.05891100  | -17.30298500 | -0.49428000 |
| H  | -0.99784000  | 18.95740500  | -0.55447300 |
| H  | -5.27338000  | 18.51181200  | -0.63276000 |
| H  | 19.23560900  | 6.65123000   | 0.62367700  |
| H  | 20.25398900  | 0.00568800   | 0.44004600  |
| H  | 3.23060500   | -17.01338400 | -0.48606000 |
| H  | -21.14150000 | -5.22355500  | 0.57421900  |
| H  | -22.17707700 | 1.42384700   | 0.50412700  |
| Ir | 6.24407400   | -5.30328300  | -0.46879000 |

|   |            |             |             |
|---|------------|-------------|-------------|
| C | 4.55172500 | -4.84294700 | 1.04830700  |
| C | 5.65205100 | -3.96799800 | 1.30677100  |
| C | 5.87411100 | -3.17950200 | 0.10856800  |
| C | 4.86433200 | -3.55195800 | -0.85266500 |
| C | 4.04071400 | -4.57599700 | -0.27848600 |
| C | 2.78323300 | -5.14070700 | -0.86253200 |
| C | 4.65540700 | -2.88556500 | -2.17839100 |
| C | 6.79979400 | -2.00788600 | -0.01897400 |
| C | 6.43431000 | -3.84646300 | 2.57795300  |
| C | 3.96911500 | -5.84606700 | 1.99593200  |
| H | 2.62163600 | -6.17362000 | -0.54710700 |
| H | 2.81199000 | -5.12875000 | -1.95501200 |
| H | 1.90817200 | -4.55659000 | -0.54847300 |
| H | 4.00022000 | -2.01309900 | -2.06055700 |
| H | 4.18510300 | -3.56349900 | -2.89394700 |
| H | 5.60117200 | -2.54655700 | -2.60425500 |
| H | 7.26505900 | -1.98399400 | -1.00723300 |
| H | 7.58970000 | -2.04953700 | 0.73479100  |
| H | 6.25242300 | -1.06909600 | 0.13359000  |
| H | 6.08558200 | -2.99528500 | 3.17635500  |
| H | 7.49785900 | -3.69851700 | 2.37318900  |
| H | 6.33956800 | -4.74567600 | 3.19087400  |
| H | 4.69494200 | -6.14762000 | 2.75430400  |
| H | 3.64434100 | -6.74661100 | 1.46909900  |
| H | 3.09630600 | -5.42891300 | 2.51289700  |
| H | 6.54181600 | -5.55355600 | -2.01894900 |
| O | 7.97840000 | -3.29322700 | -2.85260300 |
| H | 8.88105800 | -3.48119900 | -2.56680800 |
| H | 7.46916400 | -4.00448800 | -2.42286500 |

**IM-3 + HCOOH**

|   |             |             |             |
|---|-------------|-------------|-------------|
| C | 22.15719700 | -1.47410200 | -0.43385900 |
| C | 21.29037900 | 0.84789000  | -0.46870800 |
| H | 23.17133200 | -1.08552800 | -0.40468100 |
| C | 21.07170700 | -0.53739300 | -0.46677700 |
| C | 20.59409500 | -3.33877100 | -0.48368300 |
| C | 21.92854300 | -2.81501600 | -0.44163400 |
| C | 20.34156800 | -4.71811600 | -0.50204200 |
| H | 22.75653500 | -3.51801600 | -0.41869600 |
| C | 1.66120500  | 14.11201800 | 0.52605700  |
| C | 0.69022900  | 16.35373300 | 0.54585600  |
| C | 2.17091000  | 18.34502000 | 0.51498400  |
| H | -0.17842900 | 17.00596300 | 0.57012900  |
| H | 13.25640700 | 3.94184600  | 0.08742000  |

|   |              |             |             |
|---|--------------|-------------|-------------|
| C | 18.63581900  | -0.10411100 | -0.53471600 |
| H | -4.60473900  | 11.59504300 | -0.24343400 |
| C | 4.43891200   | 16.67939700 | 0.57078900  |
| C | 5.42901400   | 14.45516400 | 0.64110700  |
| C | 3.96145400   | 12.42971200 | 0.56899200  |
| C | 5.10024000   | 11.47987200 | 0.54944500  |
| C | 5.14913100   | 10.41825900 | 1.46897000  |
| C | 6.16920700   | 9.47707400  | 1.42555500  |
| C | 7.19809800   | 9.58229900  | 0.47620900  |
| C | 7.14593000   | 10.62967400 | -0.46089600 |
| C | 6.11075500   | 11.55723900 | -0.42358500 |
| H | 6.30241800   | 13.81948600 | 0.71784300  |
| H | 4.37450100   | 10.34009800 | 2.22558000  |
| H | 6.20360800   | 8.65527500  | 2.13302700  |
| H | 7.89155600   | 10.68362800 | -1.24792900 |
| H | 6.06272500   | 12.33746500 | -1.17647400 |
| C | 12.52424800  | 5.98920900  | -0.03631100 |
| C | 11.20914400  | 5.59811700  | 0.27326300  |
| C | 10.18908800  | 6.53417100  | 0.34573900  |
| C | 10.46209400  | 7.89198000  | 0.10817200  |
| C | 11.77678700  | 8.28322300  | -0.20265800 |
| C | 12.79765500  | 7.34701900  | -0.27319300 |
| H | 10.99674400  | 4.54789600  | 0.45609400  |
| H | 9.17130600   | 6.24628800  | 0.58390700  |
| H | 11.98897500  | 9.33318200  | -0.38719400 |
| H | 13.81547400  | 7.63549900  | -0.51079500 |
| C | 13.57718800  | 4.97610000  | -0.10469500 |
| N | 14.79435400  | 5.26604400  | -0.38533500 |
| C | -14.95242100 | 3.48605500  | -0.76885900 |
| C | -15.80175800 | 5.83710500  | -0.58624100 |
| C | -14.44692500 | 6.43705100  | -0.61289700 |
| C | -14.14752900 | 7.47777500  | -1.50899200 |
| C | -12.90950800 | 8.10651200  | -1.49142000 |
| C | -11.91150400 | 7.69670200  | -0.59287500 |
| C | -12.20752400 | 6.66548800  | 0.31694400  |
| C | -13.45454400 | 6.05151200  | 0.30475300  |
| H | -13.94951700 | 3.85725700  | -0.94213700 |
| H | -14.90038700 | 7.78938400  | -2.22642100 |
| H | -12.68162100 | 8.91401400  | -2.17928000 |
| H | -11.47550800 | 6.38301700  | 1.06699700  |
| H | -13.68139500 | 5.28401000  | 1.03772900  |
| C | -4.56556600  | 10.51817400 | -0.02324700 |
| N | -3.47323600  | 9.93482000  | 0.30929200  |
| C | 4.13423800   | 13.83576300 | 0.57008700  |



|   |              |             |             |
|---|--------------|-------------|-------------|
| C | 5.57458000   | 15.80806100 | 0.63283300  |
| C | 4.57172100   | 18.07683100 | 0.55774600  |
| H | 6.56432500   | 16.25268200 | 0.69021000  |
| H | -9.56264400  | 6.70292700  | -0.12504900 |
| C | -16.01628900 | 4.43498700  | -0.59770800 |
| H | 9.70867300   | 9.93386200  | -0.03787900 |
| C | 1.99160100   | 16.95278200 | 0.52721600  |
| C | 0.53332900   | 15.00211700 | 0.55389900  |
| C | 1.51910500   | 12.70242100 | 0.52552900  |
| C | 0.19929400   | 12.02857800 | 0.46419300  |
| C | -0.11812600  | 11.01272400 | 1.38185500  |
| C | -1.32387000  | 10.32766000 | 1.30645800  |
| C | -2.27194000  | 10.65686900 | 0.32485000  |
| C | -1.95163000  | 11.65431900 | -0.61345200 |
| C | -0.73448100  | 12.32292700 | -0.54330200 |
| H | -0.46088000  | 14.57501700 | 0.59712900  |
| H | 0.59348900   | 10.76794300 | 2.16440800  |
| H | -1.56735100  | 9.54280700  | 2.01482000  |
| H | -2.64050800  | 11.86945200 | -1.42426700 |
| H | -0.48662500  | 13.06549500 | -1.29505500 |
| C | -8.31619100  | 8.48647400  | -0.26984200 |
| C | -7.14679100  | 7.77646700  | 0.05675300  |
| C | -5.92283800  | 8.42379200  | 0.13657600  |
| C | -5.83966100  | 9.80455400  | -0.11082700 |
| C | -7.00818900  | 10.51332000 | -0.44314600 |
| C | -8.23212300  | 9.86666300  | -0.52074900 |
| H | -7.21025100  | 6.70874000  | 0.25019100  |
| H | -5.01479600  | 7.88879500  | 0.39126100  |
| H | -6.94480600  | 11.58120400 | -0.63588500 |
| H | -9.14118800  | 10.40174700 | -0.77123500 |
| C | -9.59761000  | 7.78230000  | -0.33242400 |
| N | -10.69185400 | 8.38587500  | -0.61914100 |
| C | 17.31293600  | -0.64616400 | -0.66739000 |
| C | 18.89438000  | 1.29016100  | -0.49708100 |
| C | 17.80534100  | 2.29476000  | -0.46402700 |
| C | 17.81068900  | 3.38341500  | -1.35273500 |
| C | 16.82080900  | 4.35670700  | -1.30183400 |
| C | 15.77027000  | 4.25966800  | -0.37565800 |
| C | 15.77409600  | 3.18960800  | 0.53725000  |
| C | 16.77692200  | 2.22841400  | 0.49137500  |
| H | 16.48215000  | 0.03801400  | -0.78989700 |
| H | 18.59866700  | 3.45412900  | -2.09622300 |
| H | 16.82465900  | 5.19559200  | -1.98982800 |
| H | 15.01364500  | 3.14016100  | 1.31019900  |

|   |              |              |             |
|---|--------------|--------------|-------------|
| H | 16.78417400  | 1.42525400   | 1.22127800  |
| C | 9.40301800   | 8.89958200   | 0.17743600  |
| N | 8.19555600   | 8.59828700   | 0.48546700  |
| C | 3.44839900   | 18.89940300  | 0.52639200  |
| C | 2.97632200   | 14.67670400  | 0.54346800  |
| H | 3.56910100   | 19.97843300  | 0.51672700  |
| C | 2.66612800   | 11.90531300  | 0.56312900  |
| C | 3.13512000   | 16.09805200  | 0.54449900  |
| H | 2.54627100   | 10.82746100  | 0.52475200  |
| C | 19.72937100  | -1.02464900  | -0.50175200 |
| C | 20.22372700  | 1.73598300   | -0.48168600 |
| H | 20.41285600  | 2.80439700   | -0.44770400 |
| C | -2.21235900  | -15.07062100 | 0.60643500  |
| C | -3.29766700  | -12.89062600 | 0.56378700  |
| C | -1.91450200  | -10.80705900 | 0.46247400  |
| C | -3.10110300  | -9.92094200  | 0.37642800  |
| C | -3.27308000  | -8.86872300  | 1.29247200  |
| C | -4.36485100  | -8.01189000  | 1.20993700  |
| C | -5.32221600  | -8.19452500  | 0.20502100  |
| C | -5.15656600  | -9.22671700  | -0.72664600 |
| C | -4.05725700  | -10.07590700 | -0.63915400 |
| H | -4.19995500  | -12.29238300 | 0.59006400  |
| H | -2.54760400  | -8.73978700  | 2.08981300  |
| H | -4.50429900  | -7.20275200  | 1.91698500  |
| H | -5.87098000  | -9.33461900  | -1.53651800 |
| H | -3.92197200  | -10.85602400 | -1.38109100 |
| C | -10.56081800 | -4.79048200  | -0.32022800 |
| C | -9.21049500  | -4.47411800  | -0.12563800 |
| C | -8.22072700  | -5.46489700  | -0.03434300 |
| C | -8.67842500  | -6.81318500  | -0.14650300 |
| C | -10.03798200 | -7.14069700  | -0.33975800 |
| C | -10.97810200 | -6.13689300  | -0.43261400 |
| H | -8.94404400  | -3.43045300  | -0.01082900 |
| H | -10.33582800 | -8.18412300  | -0.41152200 |
| H | -12.03121300 | -6.34515800  | -0.57992400 |
| C | -11.53337500 | -3.69861500  | -0.37760800 |
| N | -12.78225100 | -3.90854000  | -0.58484800 |
| C | 17.08399600  | -1.98819200  | -0.67765500 |
| C | 17.93385600  | -4.34153400  | -0.53691600 |
| C | 16.57533600  | -4.93403200  | -0.52182900 |
| C | 16.23954400  | -5.96321400  | -1.41837900 |
| C | 14.99182800  | -6.57154600  | -1.37875000 |
| C | 14.01963100  | -6.15008700  | -0.45759200 |
| C | 14.35412600  | -5.13562700  | 0.45738800  |

|   |              |              |             |
|---|--------------|--------------|-------------|
| C | 15.61180600  | -4.54404400  | 0.42421400  |
| H | 16.07374000  | -2.35622400  | -0.80901300 |
| H | 16.97007000  | -6.27937300  | -2.15657700 |
| H | 14.73503300  | -7.36792000  | -2.06934400 |
| H | 13.64230500  | -4.84798700  | 1.22479400  |
| H | 15.86797500  | -3.78787100  | 1.15931700  |
| C | 6.59610600   | -8.76522200  | 0.07024800  |
| N | 5.50315500   | -8.15418700  | 0.34775300  |
| C | 0.45283400   | -12.38708300 | 0.54508400  |
| C | 1.51751000   | -14.58231400 | 0.67706300  |
| C | 0.12488600   | -16.63649800 | 0.67893800  |
| H | 2.41218700   | -15.19436500 | 0.75085600  |
| H | -11.12536100 | -2.68747900  | -0.23578200 |
| C | -16.49200000 | 1.59718900   | -0.56277300 |
| H | 6.62016100   | -9.84819200  | -0.11977600 |
| C | 0.24424100   | -15.23828900 | 0.64398300  |
| C | 1.61649900   | -13.22586200 | 0.63810000  |
| C | 0.53538600   | -10.97319100 | 0.49525900  |
| C | 1.83350300   | -10.25774800 | 0.43991500  |
| C | 2.11523300   | -9.21790900  | 1.34158800  |
| C | 3.31775800   | -8.52363200  | 1.28393800  |
| C | 4.29538400   | -8.86721300  | 0.33692500  |
| C | 4.00404700   | -9.87943900  | -0.59511300 |
| C | 2.79202100   | -10.55766500 | -0.54234600 |
| H | 2.59004700   | -12.75507400 | 0.69262400  |
| H | 1.38295000   | -8.96652500  | 2.10285800  |
| H | 3.53737600   | -7.72564800  | 1.98540600  |
| H | 4.71526600   | -10.10337600 | -1.38384700 |
| H | 2.57056400   | -11.31919100 | -1.28332000 |
| C | 10.40451300  | -6.83921300  | -0.12657200 |
| C | 9.24987200   | -6.09192900  | 0.16802600  |
| C | 8.00616800   | -6.70306300  | 0.23291400  |
| C | 7.88912000   | -8.08461200  | 0.00513700  |
| C | 9.04399200   | -8.83141100  | -0.29008300 |
| C | 10.28663400  | -8.22062200  | -0.35560300 |
| H | 9.33966300   | -5.02330500  | 0.34540200  |
| H | 7.10889100   | -6.13802000  | 0.45958800  |
| H | 8.95424500   | -9.90022700  | -0.46626500 |
| H | 11.18447500  | -8.78473500  | -0.58157100 |
| C | 11.70613200  | -6.17222200  | -0.18778300 |
| N | 12.78264200  | -6.80799000  | -0.47182600 |
| C | -15.17792900 | 2.14316200   | -0.75431700 |
| C | -16.74593400 | 0.20206900   | -0.51674400 |
| C | -15.66568200 | -0.81229100  | -0.55021400 |

|   |              |              |             |
|---|--------------|--------------|-------------|
| C | -15.75997500 | -1.91237200  | -1.42078600 |
| C | -14.80343000 | -2.91811500  | -1.41386500 |
| C | -13.69510900 | -2.84731100  | -0.55419500 |
| C | -13.59741400 | -1.75522100  | 0.32708400  |
| C | -14.56985000 | -0.76073000  | 0.32826600  |
| H | -14.35217400 | 1.46117000   | -0.91669700 |
| H | -16.59680300 | -1.96955800  | -2.11013200 |
| H | -14.88239700 | -3.77077700  | -2.08015500 |
| H | -12.78270600 | -1.71542200  | 1.04336300  |
| H | -14.50152600 | 0.05331300   | 1.04289200  |
| C | -7.63920700  | -7.78007900  | -0.03857700 |
| N | -6.42580900  | -7.31428600  | 0.12065900  |
| C | -2.02840100  | -12.21828900 | 0.50901300  |
| C | -3.38528200  | -14.24788200 | 0.60189400  |
| C | -2.28534400  | -16.47198700 | 0.64197500  |
| H | -4.35664400  | -14.73260200 | 0.64619600  |
| H | 11.70239400  | -5.09076900  | 0.01198800  |
| C | 18.15187400  | -2.93996600  | -0.55491100 |
| H | -7.81456800  | -8.85476600  | -0.05178600 |
| C | -0.64461100  | -10.22444700 | 0.47514700  |
| C | -0.93443900  | -14.43439600 | 0.59643200  |
| H | -0.56995900  | -9.14368900  | 0.40544700  |
| C | -1.12761000  | -17.24534800 | 0.67423200  |
| C | -0.83615300  | -13.00846700 | 0.54717100  |
| H | -1.20196300  | -18.32819300 | 0.70169900  |
| C | 19.04113000  | -5.20225700  | -0.52616000 |
| H | 18.86607600  | -6.27336400  | -0.50533200 |
| C | 19.48885500  | -2.43428400  | -0.51090800 |
| C | -18.45419000 | 4.82820000   | -0.42006300 |
| C | -19.78415500 | 4.30223300   | -0.31618500 |
| C | -18.20664400 | 6.20811300   | -0.45126500 |
| H | -20.61165700 | 5.00369500   | -0.25657300 |
| C | -17.34890900 | 3.92609000   | -0.49597600 |
| C | -16.90975100 | 6.69523700   | -0.53002900 |
| H | -16.73625100 | 7.76669100   | -0.51494800 |
| C | -20.00861400 | 2.96089500   | -0.29446300 |
| C | -19.13959200 | 0.64170500   | -0.36502600 |
| H | -21.01918300 | 2.56951000   | -0.21707900 |
| C | -18.92360500 | 2.02704000   | -0.37664300 |
| C | -18.07351200 | -0.24372600  | -0.43133500 |
| H | -18.25947600 | -1.31213200  | -0.38657000 |
| C | -17.58505900 | 2.51582100   | -0.47593600 |
| H | 1.02698500   | -17.24076900 | 0.71373900  |
| H | 1.29535100   | 18.98797700  | 0.50031300  |

|    |              |              |             |
|----|--------------|--------------|-------------|
| H  | 5.56751200   | 18.51073700  | 0.57644600  |
| H  | -19.04436800 | 6.89743900   | -0.39400600 |
| H  | -20.15565000 | 0.26513400   | -0.28667700 |
| H  | -3.26181700  | -16.94800300 | 0.64796900  |
| H  | 21.17906800  | -5.40970300  | -0.48035300 |
| H  | 22.30975700  | 1.22252700   | -0.44237000 |
| Ir | -6.22079000  | -5.24817800  | 0.22048100  |
| C  | -4.24500800  | -4.95971500  | -1.00791500 |
| C  | -5.32616600  | -4.29847200  | -1.69228400 |
| C  | -5.83984800  | -3.28248700  | -0.80684700 |
| C  | -5.08657600  | -3.33649500  | 0.42052500  |
| C  | -4.07676600  | -4.37058200  | 0.28198900  |
| C  | -2.98744600  | -4.66753500  | 1.26637000  |
| C  | -5.16695700  | -2.35153500  | 1.54679800  |
| C  | -6.85553400  | -2.24496600  | -1.16830900 |
| C  | -5.76851600  | -4.54637900  | -3.10140800 |
| C  | -3.41068500  | -6.06005200  | -1.58686600 |
| H  | -2.65566000  | -5.70592600  | 1.19501400  |
| H  | -3.32463500  | -4.49411500  | 2.29116600  |
| H  | -2.11256000  | -4.02770100  | 1.09215400  |
| H  | -4.42260800  | -1.55703800  | 1.40824500  |
| H  | -4.96717700  | -2.83078200  | 2.50822300  |
| H  | -6.15213500  | -1.88688000  | 1.59699900  |
| H  | -7.37309200  | -1.86808400  | -0.28529500 |
| H  | -7.60340600  | -2.64524400  | -1.85647500 |
| H  | -6.36366000  | -1.39963600  | -1.66580600 |
| H  | -5.21613000  | -3.91560100  | -3.81049100 |
| H  | -6.83246800  | -4.33102300  | -3.22368700 |
| H  | -5.60642200  | -5.58773500  | -3.39097700 |
| H  | -4.00814900  | -6.72567900  | -2.21409300 |
| H  | -2.94740900  | -6.66830100  | -0.80881600 |
| H  | -2.61206000  | -5.64104900  | -2.21086200 |
| H  | -6.44945400  | -5.48146300  | 1.78490800  |
| O  | -8.10236800  | -3.83941000  | 2.93204400  |
| H  | -7.60892100  | -4.13457600  | 2.12446700  |
| C  | -8.65859800  | -2.64676200  | 2.77577800  |
| O  | -8.57987000  | -1.92337200  | 1.80305100  |
| H  | -9.22451100  | -2.37835400  | 3.68213000  |

## TS2

|   |              |             |            |
|---|--------------|-------------|------------|
| C | -21.99958600 | -1.24075200 | 0.85373800 |
| C | -21.09360300 | 1.06628500  | 0.83454700 |
| H | -23.00749300 | -0.83524600 | 0.85155000 |
| C | -20.89810700 | -0.32241500 | 0.84224700 |

|   |              |             |             |
|---|--------------|-------------|-------------|
| C | -20.46701800 | -3.13103400 | 0.87603200  |
| C | -21.79320700 | -2.58518900 | 0.86969400  |
| C | -20.23712900 | -4.51420600 | 0.90148300  |
| H | -22.63309900 | -3.27422800 | 0.88045000  |
| C | -1.37048000  | 14.11117600 | -0.82970900 |
| C | -0.38838000  | 16.34599400 | -0.92591400 |
| C | -1.85926400  | 18.34449500 | -0.96253100 |
| H | 0.48346600   | 16.99273300 | -0.97256400 |
| H | -13.03177400 | 4.03708800  | 0.00962200  |
| C | -18.45426800 | 0.07025200  | 0.83038000  |
| H | 4.87975300   | 11.57731600 | 0.07978400  |
| C | -4.13553500  | 16.68914400 | -0.95880900 |
| C | -5.13663200  | 14.46868900 | -0.95091400 |
| C | -3.67888300  | 12.43975900 | -0.81286800 |
| C | -4.82295000  | 11.49773400 | -0.75611700 |
| C | -4.88488200  | 10.40734600 | -1.64035400 |
| C | -5.91087800  | 9.47494100  | -1.55957800 |
| C | -6.93206300  | 9.61719000  | -0.60671700 |
| C | -6.86618800  | 10.69375300 | 0.29592200  |
| C | -5.82592400  | 11.61317300 | 0.22093000  |
| H | -6.01320100  | 13.83491000 | -1.00373000 |
| H | -4.11600400  | 10.29952900 | -2.39920900 |
| H | -5.95573300  | 8.63105400  | -2.23993700 |
| H | -7.60525500  | 10.77792500 | 1.08645800  |
| H | -5.76769200  | 12.41739300 | 0.94741400  |
| C | -12.27717600 | 6.07963300  | 0.07581600  |
| C | -10.97162100 | 5.67021400  | -0.25002400 |
| C | -9.94540600  | 6.59555700  | -0.36327700 |
| C | -10.20281300 | 7.96084200  | -0.15260600 |
| C | -11.50828100 | 8.37050800  | 0.17309800  |
| C | -12.53495500 | 7.44493600  | 0.28566000  |
| H | -10.77130300 | 4.61427200  | -0.41237100 |
| H | -8.93465600  | 6.29334500  | -0.61337700 |
| H | -11.70846700 | 9.42631300  | 0.33649600  |
| H | -13.54558300 | 7.74747700  | 0.53608200  |
| C | -13.33738900 | 5.07807100  | 0.18975900  |
| N | -14.54387700 | 5.38611700  | 0.49588300  |
| C | 15.06010900  | 3.32117200  | 1.01560500  |
| C | 15.97110100  | 5.65227100  | 0.87963300  |
| C | 14.63043400  | 6.28261000  | 0.83966400  |
| C | 14.31073800  | 7.32869000  | 1.72248900  |
| C | 13.08778400  | 7.98225900  | 1.64867800  |
| C | 12.12428000  | 7.59246100  | 0.70474600  |
| C | 12.44204600  | 6.55754200  | -0.19331400 |

|   |              |             |             |
|---|--------------|-------------|-------------|
| C | 13.67505600  | 5.91909100  | -0.12488700 |
| H | 14.05815200  | 3.71534600  | 1.13529900  |
| H | 15.03515400  | 7.62399200  | 2.47521700  |
| H | 12.84429700  | 8.79310300  | 2.32716900  |
| H | 11.73964300  | 6.29122800  | -0.97689300 |
| H | 13.92085000  | 5.14865900  | -0.84866100 |
| C | 4.83304000   | 10.49656500 | -0.11851400 |
| N | 3.74026200   | 9.91573500  | -0.45382900 |
| C | -3.84467800  | 13.84579300 | -0.86141300 |
| C | -5.27556700  | 15.82177700 | -0.98892500 |
| C | -4.26145100  | 18.08684400 | -0.99349900 |
| H | -6.26324400  | 16.26905400 | -1.05964400 |
| H | 9.78278100   | 6.62962000  | 0.15987400  |
| C | 16.15286200  | 4.24563700  | 0.90203900  |
| H | -9.43365700  | 9.99995000  | -0.07347900 |
| C | -1.68679200  | 16.95179100 | -0.92725400 |
| C | -0.23814500  | 14.99412100 | -0.88784800 |
| C | -1.23547000  | 12.70177400 | -0.78189100 |
| C | 0.08122900   | 12.02457100 | -0.69560400 |
| C | 0.39803400   | 10.97919400 | -1.57954000 |
| C | 1.60006200   | 10.29105900 | -1.47637400 |
| C | 2.54438800   | 10.64547900 | -0.49995000 |
| C | 2.22449300   | 11.67373500 | 0.40477100  |
| C | 1.01160000   | 12.34624500 | 0.30674200  |
| H | 0.75393500   | 14.56079500 | -0.91642600 |
| H | -0.31119600  | 10.71311600 | -2.35728400 |
| H | 1.84310800   | 9.48295800  | -2.15824800 |
| H | 2.90941500   | 11.91045200 | 1.21290000  |
| H | 0.76358000   | 13.11351700 | 1.03320600  |
| C | 8.55483100   | 8.42953000  | 0.24567500  |
| C | 7.38615700   | 7.72780100  | -0.10074600 |
| C | 6.17185200   | 8.38695200  | -0.22001300 |
| C | 6.09814200   | 9.77208100  | 0.00504000  |
| C | 7.26640500   | 10.47332100 | 0.35378800  |
| C | 8.48053800   | 9.81439900  | 0.47250000  |
| H | 7.44224400   | 6.65655300  | -0.27630000 |
| H | 5.26400100   | 7.85811600  | -0.48785900 |
| H | 7.21045500   | 11.54468600 | 0.52855900  |
| H | 9.38881200   | 10.34328200 | 0.73858200  |
| C | 9.82446300   | 7.71063900  | 0.35786300  |
| N | 10.91615200  | 8.30161900  | 0.67842300  |
| C | -17.13722400 | -0.49297400 | 0.92876400  |
| C | -18.69070100 | 1.46824900  | 0.78442300  |
| C | -17.58774400 | 2.45502700  | 0.70654100  |

|   |              |              |             |
|---|--------------|--------------|-------------|
| C | -17.55371500 | 3.55703900   | 1.57815100  |
| C | -16.55355600 | 4.51635700   | 1.48423400  |
| C | -15.53080500 | 4.39125800   | 0.53070000  |
| C | -15.57314300 | 3.30675400   | -0.36392100 |
| C | -16.58689900 | 2.35996500   | -0.27538400 |
| H | -16.29170200 | 0.17807200   | 1.01879800  |
| H | -18.31953100 | 3.64972400   | 2.34208600  |
| H | -16.52769300 | 5.36599300   | 2.15842400  |
| H | -14.83490600 | 3.23512500   | -1.15644600 |
| H | -16.62497200 | 1.54612400   | -0.99235500 |
| C | -9.13755200  | 8.95798600   | -0.26362400 |
| N | -7.93580600  | 8.63988300   | -0.57725100 |
| C | -3.13405300  | 18.90443300  | -0.99166200 |
| C | -2.68272900  | 14.68146800  | -0.86521200 |
| H | -3.24946400  | 19.98374000  | -1.01885300 |
| C | -2.38622900  | 11.90921200  | -0.79180600 |
| C | -2.83454400  | 16.10268600  | -0.91436500 |
| H | -2.27163000  | 10.83265700  | -0.71733600 |
| C | -19.56357800 | -0.83190200  | 0.84143900  |
| C | -20.01248300 | 1.93614300   | 0.80422200  |
| H | -20.18495400 | 3.00711200   | 0.76307400  |
| C | 2.18996400   | -15.14383300 | -0.91694800 |
| C | 3.27611300   | -12.96383600 | -0.90731600 |
| C | 1.89738000   | -10.88035200 | -0.76356200 |
| C | 3.08372800   | -9.99201700  | -0.70987500 |
| C | 3.21691800   | -8.92486200  | -1.61257300 |
| C | 4.30434100   | -8.05847600  | -1.56031200 |
| C | 5.30080400   | -8.24905400  | -0.59410900 |
| C | 5.16405700   | -9.29164600  | 0.33742400  |
| C | 4.07246700   | -10.14980700 | 0.27513600  |
| H | 4.17680800   | -12.36505300 | -0.96159700 |
| H | 2.46099400   | -8.78475400  | -2.37905300 |
| H | 4.40025800   | -7.22841300  | -2.25061000 |
| H | 5.89399700   | -9.39734200  | 1.13344700  |
| H | 3.96467800   | -10.93484600 | 1.01643800  |
| C | 10.51914700  | -4.85916700  | 0.28205600  |
| C | 9.17912300   | -4.52785300  | 0.04151400  |
| C | 8.18301000   | -5.50847800  | -0.06488800 |
| C | 8.61963300   | -6.86422500  | 0.00579500  |
| C | 9.96680400   | -7.20440200  | 0.24683200  |
| C | 10.91143700  | -6.21155900  | 0.40190800  |
| H | 8.91911400   | -3.47956800  | -0.07138200 |
| H | 10.25489100  | -8.25152600  | 0.29667500  |
| H | 11.95429400  | -6.43407400  | 0.59338600  |



|   |              |              |             |
|---|--------------|--------------|-------------|
| C | 11.50754100  | -3.78611600  | 0.40096700  |
| N | 12.73850600  | -4.02211500  | 0.67166900  |
| C | -16.93055300 | -1.83856700  | 0.94634100  |
| C | -17.82353400 | -4.17843400  | 0.85628100  |
| C | -16.47644900 | -4.79431900  | 0.80292500  |
| C | -16.12912800 | -5.82171900  | 1.69715400  |
| C | -14.89429800 | -6.45257300  | 1.62178800  |
| C | -13.94603800 | -6.05648700  | 0.66508600  |
| C | -14.29285800 | -5.04374200  | -0.24720700 |
| C | -15.53808700 | -4.42938600  | -0.17771100 |
| H | -15.92301900 | -2.22245100  | 1.05059300  |
| H | -16.84017000 | -6.11864200  | 2.46190300  |
| H | -14.62881300 | -7.24759900  | 2.31065400  |
| H | -13.60192600 | -4.77539300  | -1.04025900 |
| H | -15.80521000 | -3.67497600  | -0.91072900 |
| C | -6.58580300  | -8.79314000  | -0.09962700 |
| N | -5.49549900  | -8.19672100  | -0.41606000 |
| C | -0.47213600  | -12.46019100 | -0.77519800 |
| C | -1.54043900  | -14.65538700 | -0.87510000 |
| C | -0.14858600  | -16.70970500 | -0.91869700 |
| H | -2.43698700  | -15.26738400 | -0.92203600 |
| H | 11.12882500  | -2.76320900  | 0.25614400  |
| C | 16.56515500  | 1.39764400   | 0.89162300  |
| H | -6.61819600  | -9.87520400  | 0.09423400  |
| C | -0.26678700  | -15.31146100 | -0.88029000 |
| C | -1.63802300  | -13.29886400 | -0.83327500 |
| C | -0.55266900  | -11.04628200 | -0.72288100 |
| C | -1.84712600  | -10.32831000 | -0.62858900 |
| C | -2.14874800  | -9.28250700  | -1.51695500 |
| C | -3.34413900  | -8.58062800  | -1.42014000 |
| C | -4.29536000  | -8.92182400  | -0.44576700 |
| C | -3.98423600  | -9.94178200  | 0.47133300  |
| C | -2.77886700  | -10.62775200 | 0.37935600  |
| H | -2.61272400  | -12.82791700 | -0.85884400 |
| H | -1.43703400  | -9.03108900  | -2.29738800 |
| H | -3.57846700  | -7.77684100  | -2.11011200 |
| H | -4.67296300  | -10.16497700 | 1.28002000  |
| H | -2.54046000  | -11.39386100 | 1.11027200  |
| C | -10.35601300 | -6.80843200  | 0.21910700  |
| C | -9.20056100  | -6.08037600  | -0.11746300 |
| C | -7.96947700  | -6.71105800  | -0.22190200 |
| C | -7.86604500  | -8.09348400  | 0.00733000  |
| C | -9.02161400  | -8.82107700  | 0.34467500  |
| C | -10.25178200 | -8.19066700  | 0.44980500  |

|   |              |              |             |
|---|--------------|--------------|-------------|
| H | -9.27976200  | -5.01113300  | -0.29621300 |
| H | -7.07167300  | -6.16112900  | -0.48122300 |
| H | -8.94250000  | -9.89054000  | 0.52204000  |
| H | -11.15001700 | -8.74000900  | 0.70834400  |
| C | -11.64385900 | -6.12032000  | 0.32059700  |
| N | -12.72105400 | -6.73632300  | 0.64319200  |
| C | 15.25541100  | 1.97350000   | 1.01185800  |
| C | 16.78977500  | -0.00271700  | 0.85861700  |
| C | 15.68617700  | -0.99169600  | 0.82650200  |
| C | 15.70237800  | -2.09514800  | 1.69783100  |
| C | 14.72644700  | -3.07978300  | 1.62893900  |
| C | 13.67491400  | -2.98176600  | 0.70327500  |
| C | 13.65521300  | -1.88615300  | -0.17842400 |
| C | 14.64774900  | -0.91366900  | -0.11719200 |
| H | 14.40679300  | 1.31050500   | 1.12922600  |
| H | 16.49439200  | -2.17256900  | 2.43628200  |
| H | 14.74634800  | -3.93557700  | 2.29553000  |
| H | 12.89003600  | -1.82998600  | -0.94640100 |
| H | 14.64275500  | -0.09773200  | -0.83283000 |
| C | 7.59595300   | -7.82824500  | -0.23457000 |
| N | 6.40626100   | -7.37257300  | -0.52445200 |
| C | 2.00918000   | -12.29159600 | -0.81387900 |
| C | 3.36255200   | -14.32113200 | -0.94804100 |
| C | 2.26168900   | -16.54524500 | -0.95460200 |
| H | 4.33207300   | -14.80594100 | -1.02216000 |
| H | -11.62905400 | -5.03995100  | 0.11537600  |
| C | -18.01746100 | -2.77323600  | 0.86662900  |
| H | 7.78145700   | -8.90109400  | -0.19417500 |
| C | 0.62749600   | -10.29781400 | -0.73782500 |
| C | 0.91287200   | -14.50757400 | -0.86834300 |
| H | 0.55563700   | -9.21717900  | -0.66496600 |
| C | 1.10347800   | -17.31856900 | -0.95178300 |
| C | 0.81622500   | -13.08163900 | -0.81611200 |
| H | 1.17694000   | -18.40144900 | -0.98147900 |
| C | -18.94487600 | -5.02018100  | 0.88961900  |
| H | -18.78851200 | -6.09426300  | 0.87435600  |
| C | -19.34650200 | -2.24527200  | 0.85887800  |
| C | 18.60505900  | 4.58283200   | 0.85475700  |
| C | 19.92638100  | 4.02660500   | 0.82344700  |
| C | 18.38766900  | 5.96804300   | 0.87137900  |
| H | 20.77161700  | 4.70898500   | 0.80805100  |
| C | 17.47702600  | 3.70633300   | 0.87173900  |
| C | 17.09989300  | 6.48474800   | 0.88120800  |
| H | 16.95205600  | 7.55984900   | 0.85691500  |

|    |              |              |             |
|----|--------------|--------------|-------------|
| C  | 20.12126900  | 2.68052400   | 0.81542700  |
| C  | 19.19720900  | 0.38180300   | 0.84027100  |
| H  | 21.12536300  | 2.26623100   | 0.79343200  |
| C  | 19.01235300  | 1.77171500   | 0.83918100  |
| C  | 18.10926300  | -0.47918200  | 0.84749400  |
| H  | 18.27319900  | -1.55157800  | 0.81264300  |
| C  | 17.68188600  | 2.29107700   | 0.86498400  |
| H  | -1.05138100  | -17.31393000 | -0.92623800 |
| H  | -0.98057100  | 18.98328100  | -0.97065900 |
| H  | -5.25510900  | 18.52481400  | -1.02578700 |
| H  | 19.24270300  | 6.63805700   | 0.85819300  |
| H  | 20.20717300  | -0.01781500  | 0.81826000  |
| H  | 3.23754400   | -17.02128200 | -0.99022100 |
| H  | -21.08635600 | -5.19158700  | 0.91355100  |
| H  | -22.10694400 | 1.45784500   | 0.83498900  |
| Ir | 6.27043500   | -5.25827400  | -0.57442000 |
| C  | 4.99463200   | -4.97226900  | 1.18015800  |
| C  | 5.97186200   | -3.91398800  | 1.06909000  |
| C  | 5.58734500   | -3.15471700  | -0.09450100 |
| C  | 4.16480500   | -3.48527800  | -0.37836600 |
| C  | 3.81045900   | -4.57403600  | 0.37916200  |
| C  | 2.56026400   | -5.38698500  | 0.30926200  |
| C  | 3.40197700   | -2.87723300  | -1.50101000 |
| C  | 6.23945900   | -1.88696000  | -0.56349000 |
| C  | 6.99108800   | -3.55633500  | 2.10458200  |
| C  | 4.94248200   | -5.99420200  | 2.27759800  |
| H  | 2.15106700   | -5.58403900  | 1.30685100  |
| H  | 2.75731700   | -6.35998800  | -0.15881100 |
| H  | 1.78856800   | -4.88799500  | -0.28096000 |
| H  | 3.53968300   | -1.79254300  | -1.55336400 |
| H  | 2.33216500   | -3.08554700  | -1.42674200 |
| H  | 3.76282500   | -3.31647700  | -2.44452800 |
| H  | 6.12348200   | -1.76125100  | -1.64365200 |
| H  | 7.30952700   | -1.88190100  | -0.34143900 |
| H  | 5.79514100   | -1.00626100  | -0.07978500 |
| H  | 6.48984100   | -3.00838100  | 2.91223600  |
| H  | 7.77826000   | -2.91418200  | 1.70932400  |
| H  | 7.46490200   | -4.44038800  | 2.53527700  |
| H  | 5.94587600   | -6.24880300  | 2.62704300  |
| H  | 4.46469500   | -6.91485200  | 1.93192600  |
| H  | 4.36731300   | -5.62037000  | 3.13441400  |
| H  | 4.88592200   | -5.24276200  | -2.25414700 |
| O  | 7.01645200   | -5.43553600  | -2.68100700 |
| H  | 7.39088000   | -4.56679200  | -2.88747700 |

|   |            |             |             |
|---|------------|-------------|-------------|
| H | 5.86170400 | -5.30553100 | -2.71892900 |
|---|------------|-------------|-------------|

**TS2'**

|   |              |             |             |
|---|--------------|-------------|-------------|
| C | -22.17617200 | -1.56144900 | 0.24701700  |
| C | -21.31299000 | 0.75718800  | 0.39946200  |
| H | -23.19087000 | -1.17343100 | 0.23547700  |
| C | -21.09222000 | -0.62598300 | 0.32891400  |
| C | -20.61020900 | -3.42395000 | 0.20592400  |
| C | -21.94539800 | -2.90070100 | 0.18745300  |
| C | -20.35562700 | -4.80210700 | 0.15522400  |
| H | -22.77222200 | -3.60286800 | 0.12733400  |
| C | -1.70892800  | 14.07662500 | -0.33695500 |
| C | -0.74029500  | 16.31962100 | -0.33268300 |
| C | -2.21999500  | 18.30767300 | -0.20463800 |
| H | 0.12686300   | 16.97328800 | -0.36888600 |
| H | -13.28564900 | 3.88202200  | -0.01969600 |
| C | -18.65724400 | -0.19303400 | 0.42210600  |
| H | 4.58190200   | 11.55104000 | 0.09831400  |
| C | -4.48790700  | 16.64136000 | -0.23378100 |
| C | -5.47893900  | 14.41872600 | -0.33250000 |
| C | -4.00918100  | 12.39372900 | -0.35582900 |
| C | -5.14615600  | 11.44163600 | -0.33704700 |
| C | -5.21364900  | 10.40847200 | -1.28735500 |
| C | -6.23145800  | 9.46474100  | -1.25103800 |
| C | -7.24026900  | 9.53952000  | -0.27761300 |
| C | -7.16913500  | 10.55751400 | 0.69006600  |
| C | -6.13552000  | 11.48729300 | 0.65944600  |
| H | -6.35406500  | 13.78441500 | -0.40026200 |
| H | -4.45550100  | 10.35509500 | -2.06255100 |
| H | -6.28035300  | 8.66502900  | -1.98255400 |
| H | -7.89835200  | 10.58648000 | 1.49364800  |
| H | -6.07216600  | 12.24405100 | 1.43482400  |
| C | -12.55483300 | 5.92318200  | 0.18235900  |
| C | -11.24231300 | 5.54580200  | -0.15405100 |
| C | -10.22407000 | 6.48530300  | -0.20130900 |
| C | -10.49606300 | 7.83286200  | 0.08980000  |
| C | -11.80759600 | 8.20998700  | 0.42997800  |
| C | -12.82691800 | 7.27039100  | 0.47475000  |
| H | -11.03091300 | 4.50368800  | -0.37950300 |
| H | -9.20868900  | 6.20840700  | -0.46166000 |
| H | -12.01899000 | 9.25190500  | 0.65625800  |
| H | -13.84270300 | 7.54845900  | 0.73265600  |
| C | -13.60654200 | 4.90721300  | 0.21598800  |
| N | -14.82312000 | 5.18372300  | 0.51241100  |

|   |             |             |             |
|---|-------------|-------------|-------------|
| C | 14.95059700 | 3.46062200  | 0.34819200  |
| C | 15.77545600 | 5.77447700  | -0.14726200 |
| C | 14.42797400 | 6.38326800  | -0.04783400 |
| C | 14.20930900 | 7.49976200  | 0.77705800  |
| C | 12.97168900 | 8.12855100  | 0.81992800  |
| C | 11.89650700 | 7.64618600  | 0.05666300  |
| C | 12.11186500 | 6.53896700  | -0.78423300 |
| C | 13.35650700 | 5.92267900  | -0.83254400 |
| H | 13.96848400 | 3.85541400  | 0.57891400  |
| H | 15.02453900 | 7.87024300  | 1.39089200  |
| H | 12.80435200 | 8.99362000  | 1.45304300  |
| H | 11.31613400 | 6.19404200  | -1.43684000 |
| H | 13.51753500 | 5.09184400  | -1.51190600 |
| C | 4.53104400  | 10.47059300 | -0.10141300 |
| N | 3.42247300  | 9.88479000  | -0.36960000 |
| C | -4.18250200 | 13.79908100 | -0.31526200 |
| C | -5.62465600 | 15.77077200 | -0.28455900 |
| C | -4.62081700 | 18.03785400 | -0.18098100 |
| H | -6.61579700 | 16.21568700 | -0.30103500 |
| H | 9.51423500  | 6.63863400  | -0.16714000 |
| C | 15.99154600 | 4.37851100  | -0.01952000 |
| H | -9.74215800 | 9.86977000  | 0.29795600  |
| C | -2.04062100 | 16.91639700 | -0.25772300 |
| C | -0.58313300 | 14.96881800 | -0.37919800 |
| C | -1.56610600 | 12.66739400 | -0.37347400 |
| C | -0.24601200 | 11.99156300 | -0.36773000 |
| C | 0.03417200  | 10.98477300 | -1.30771300 |
| C | 1.23870500  | 10.29429100 | -1.28425900 |
| C | 2.22407000  | 10.61060800 | -0.33566000 |
| C | 1.94340600  | 11.60004800 | 0.62325400  |
| C | 0.72596200  | 12.27213000 | 0.60696900  |
| H | 0.40939400  | 14.54450500 | -0.46555200 |
| H | -0.70628000 | 10.75124500 | -2.06658100 |
| H | 1.45224900  | 9.51605700  | -2.00938600 |
| H | 2.66450600  | 11.80497700 | 1.40834000  |
| H | 0.50915600  | 13.00637400 | 1.37623500  |
| C | 8.28646800  | 8.43429500  | -0.02396200 |
| C | 7.09684400  | 7.71751000  | -0.24610800 |
| C | 5.87159800  | 8.36676600  | -0.27084800 |
| C | 5.80696400  | 9.75570400  | -0.06787300 |
| C | 6.99562800  | 10.47096900 | 0.16379200  |
| C | 8.22117400  | 9.82289000  | 0.18242500  |
| H | 7.14580300  | 6.64326100  | -0.40433100 |
| H | 4.94824300  | 7.82670500  | -0.44807100 |

|   |              |              |             |
|---|--------------|--------------|-------------|
| H | 6.94659200   | 11.54512900  | 0.32304700  |
| H | 9.14578700   | 10.36295000  | 0.35235300  |
| C | 9.56795100   | 7.72739800   | -0.02358000 |
| N | 10.68208100  | 8.34069200   | 0.13962800  |
| C | -17.33384400 | -0.73895800  | 0.53139100  |
| C | -18.91775500 | 1.20107200   | 0.45150900  |
| C | -17.82983200 | 2.20726700   | 0.46439000  |
| C | -17.83501800 | 3.25465400   | 1.40138500  |
| C | -16.84636600 | 4.23059200   | 1.39290900  |
| C | -15.79744900 | 4.17701900   | 0.46136100  |
| C | -15.80144900 | 3.14902100   | -0.49870500 |
| C | -16.80278100 | 2.18532300   | -0.49450600 |
| H | -16.50453400 | -0.06026200  | 0.68936800  |
| H | -18.62196400 | 3.29090500   | 2.14845500  |
| H | -16.85032100 | 5.03763500   | 2.11799700  |
| H | -15.04257300 | 3.13579600   | -1.27464600 |
| H | -16.81032300 | 1.41593800   | -1.25991700 |
| C | -9.43924600  | 8.84422800   | 0.04103900  |
| N | -8.23741500  | 8.55544000   | -0.29908900 |
| C | -3.49742300  | 18.86069900  | -0.16276600 |
| C | -3.02434300  | 14.64011700  | -0.30087700 |
| H | -3.61819400  | 19.93899300  | -0.12192900 |
| C | -2.71404900  | 11.87087100  | -0.39761300 |
| C | -3.18370600  | 16.06092200  | -0.26146600 |
| H | -2.59322400  | 10.79252700  | -0.38887800 |
| C | -19.74921500 | -1.11245400  | 0.34194200  |
| C | -20.24772500 | 1.64520800   | 0.45697600  |
| H | -20.43845300 | 2.71372900   | 0.47475200  |
| C | 2.32923100   | -14.95913400 | -0.71616500 |
| C | 3.37735000   | -12.76896900 | -0.52367600 |
| C | 1.95907400   | -10.70853400 | -0.44376500 |
| C | 3.12508200   | -9.81315600  | -0.24613200 |
| C | 3.35594400   | -8.73514100  | -1.11619200 |
| C | 4.42853000   | -7.87024700  | -0.92601900 |
| C | 5.30828100   | -8.06742100  | 0.14462600  |
| C | 5.07378100   | -9.12326200  | 1.03781400  |
| C | 3.99841700   | -9.98264400  | 0.83999600  |
| H | 4.27072700   | -12.15918000 | -0.46846900 |
| H | 2.69292600   | -8.58897700  | -1.96314300 |
| H | 4.60516800   | -7.04689900  | -1.60744700 |
| H | 5.71355600   | -9.24250800  | 1.90620600  |
| H | 3.81334800   | -10.78206100 | 1.54992400  |
| C | 10.52935200  | -4.72548000  | 1.12714300  |
| C | 9.18946900   | -4.38233800  | 0.89153700  |

|   |              |              |             |
|---|--------------|--------------|-------------|
| C | 8.20882600   | -5.36228900  | 0.78064400  |
| C | 8.60832700   | -6.71303700  | 0.94797000  |
| C | 9.94252200   | -7.06341000  | 1.24706600  |
| C | 10.90132600  | -6.07145700  | 1.33556100  |
| H | 8.95735600   | -3.34850100  | 0.67090200  |
| H | 10.21576900  | -8.10841000  | 1.37123900  |
| H | 11.94453200  | -6.29934500  | 1.52234600  |
| C | 11.52120900  | -3.65398100  | 1.04206400  |
| N | 12.77674300  | -3.87105800  | 1.19796700  |
| C | -17.10278700 | -2.07954800  | 0.47686400  |
| C | -17.94857100 | -4.42447800  | 0.21741900  |
| C | -16.58922700 | -5.01421500  | 0.18183300  |
| C | -16.25907100 | -6.08614000  | 1.02907900  |
| C | -15.00955900 | -6.68912400  | 0.97088100  |
| C | -14.02977100 | -6.21964200  | 0.08160000  |
| C | -14.35860600 | -5.16249900  | -0.78579700 |
| C | -15.61837800 | -4.57644800  | -0.73548100 |
| H | -16.09232700 | -2.45191900  | 0.59338100  |
| H | -16.99532600 | -6.43974400  | 1.74421300  |
| H | -14.75681600 | -7.51791600  | 1.62378900  |
| H | -13.64023000 | -4.83532700  | -1.53096100 |
| H | -15.86982900 | -3.78562200  | -1.43486000 |
| C | -6.58165100  | -8.77114900  | -0.40208600 |
| N | -5.48292000  | -8.14159100  | -0.60604300 |
| C | -0.37391300  | -12.31323300 | -0.72814200 |
| C | -1.39578900  | -14.51505400 | -1.00524900 |
| C | 0.02463200   | -16.55016400 | -0.99427400 |
| H | -2.27497500  | -15.13510800 | -1.15687500 |
| H | 11.11821800  | -2.66658900  | 0.78774400  |
| C | 16.46510900  | 1.54780800   | 0.18306600  |
| H | -6.60487200  | -9.86216500  | -0.26535500 |
| C | -0.11741200  | -15.15584800 | -0.91647800 |
| C | -1.51731500  | -13.16236200 | -0.92291100 |
| C | -0.48092800  | -10.90336900 | -0.63218600 |
| C | -1.79098300  | -10.20801100 | -0.61853500 |
| C | -2.04259700  | -9.13517700  | -1.48990400 |
| C | -3.25480300  | -8.45588800  | -1.46098000 |
| C | -4.27117400  | -8.84689300  | -0.57495000 |
| C | -4.01249600  | -9.89560000  | 0.32596900  |
| C | -2.79179700  | -10.55952600 | 0.30246100  |
| H | -2.49246200  | -12.70185700 | -1.02019800 |
| H | -1.27834200  | -8.84479000  | -2.20450400 |
| H | -3.45039500  | -7.63142900  | -2.13854000 |
| H | -4.75705000  | -10.15905200 | 1.07044800  |

|   |              |              |             |
|---|--------------|--------------|-------------|
| H | -2.59673200  | -11.34951900 | 1.02072300  |
| C | -10.40646100 | -6.87651200  | -0.22595600 |
| C | -9.24923700  | -6.11035400  | -0.45450600 |
| C | -8.00039800  | -6.71147700  | -0.51479800 |
| C | -7.88086300  | -8.10172700  | -0.34989200 |
| C | -9.03881800  | -8.86794200  | -0.12475500 |
| C | -10.28642300 | -8.26705200  | -0.06279100 |
| H | -9.34081900  | -5.03477500  | -0.58173800 |
| H | -7.10082900  | -6.13136800  | -0.68807500 |
| H | -8.94723900  | -9.94358600  | 0.00200200  |
| H | -11.18639200 | -8.84564600  | 0.11231800  |
| C | -11.71266600 | -6.21881300  | -0.15791200 |
| N | -12.78985700 | -6.87228200  | 0.07923300  |
| C | 15.17557100  | 2.12126300   | 0.44707900  |
| C | 16.71545200  | 0.15301400   | 0.25516200  |
| C | 15.64682800  | -0.84206200  | 0.50963100  |
| C | 15.83563000  | -1.84021800  | 1.48143400  |
| C | 14.88208900  | -2.82736400  | 1.68970200  |
| C | 13.68769900  | -2.83452600  | 0.95216100  |
| C | 13.49344600  | -1.84761400  | -0.03328000 |
| C | 14.46232600  | -0.87363300  | -0.24760800 |
| H | 14.37029300  | 1.46605400   | 0.75587500  |
| H | 16.74220200  | -1.83087000  | 2.07880500  |
| H | 15.03097000  | -3.60209200  | 2.43472500  |
| H | 12.60259600  | -1.87461400  | -0.65424900 |
| H | 14.31795000  | -0.14254600  | -1.03663300 |
| C | 7.56696500   | -7.65800000  | 0.69876300  |
| N | 6.40098400   | -7.18857800  | 0.33249100  |
| C | 2.09727900   | -12.11536900 | -0.53002100 |
| C | 3.48718000   | -14.12278600 | -0.60459700 |
| C | 2.42506600   | -16.35718900 | -0.79760200 |
| H | 4.46630900   | -14.59362300 | -0.60161800 |
| H | -11.71129200 | -5.12909700  | -0.30589400 |
| C | -18.16870000 | -3.02575600  | 0.30401600  |
| H | 7.72200600   | -8.73427300  | 0.76872500  |
| C | 0.68462700   | -10.14076700 | -0.51569000 |
| C | 1.04399000   | -14.33983300 | -0.76563400 |
| H | 0.58972400   | -9.06415700  | -0.41328400 |
| C | 1.28323600   | -17.14310100 | -0.93193000 |
| C | 0.92167000   | -12.91816800 | -0.67226600 |
| H | 1.37516600   | -18.22312100 | -0.99384800 |
| C | -19.05455200 | -5.28501800  | 0.15935900  |
| H | -18.87787200 | -6.35352900  | 0.08572700  |
| C | -19.50641500 | -2.52043400  | 0.28136700  |



|    |              |              |             |
|----|--------------|--------------|-------------|
| C  | 18.39892200  | 4.73181400   | -0.47595700 |
| C  | 19.71229200  | 4.18643900   | -0.66031500 |
| C  | 18.15419700  | 6.11037100   | -0.55505300 |
| H  | 20.52884100  | 4.87130000   | -0.87157300 |
| C  | 17.30801400  | 3.85080800   | -0.20190400 |
| C  | 16.87094400  | 6.61406000   | -0.39565700 |
| H  | 16.69520800  | 7.68046300   | -0.49748200 |
| C  | 19.93482900  | 2.84745700   | -0.57214100 |
| C  | 19.08053400  | 0.55425500   | -0.18350600 |
| H  | 20.93292800  | 2.44149400   | -0.71175000 |
| C  | 18.86496600  | 1.93567400   | -0.28903700 |
| C  | 18.02820400  | -0.31050100  | 0.08062600  |
| H  | 18.21025900  | -1.37951600  | 0.12674300  |
| C  | 17.54259800  | 2.44348100   | -0.10511000 |
| H  | -0.86434400  | -17.16404700 | -1.10799000 |
| H  | -1.34462300  | 18.95103800  | -0.20069000 |
| H  | -5.61691000  | 18.47089600  | -0.15851200 |
| H  | 18.98131000  | 6.78358600   | -0.76228800 |
| H  | 20.08389600  | 0.16278000   | -0.32638100 |
| H  | 3.40676900   | -16.82061000 | -0.75805300 |
| H  | -21.19198000 | -5.49288400  | 0.09609400  |
| H  | -22.33291100 | 1.13115500   | 0.39044900  |
| Ir | 6.27338700   | -5.06755600  | 0.24351900  |
| C  | 4.53665800   | -4.76866200  | 1.49778100  |
| C  | 5.62770100   | -3.86499400  | 1.87980700  |
| C  | 5.83991800   | -2.95157100  | 0.78370300  |
| C  | 4.88311200   | -3.29645200  | -0.24595000 |
| C  | 4.04705800   | -4.36744300  | 0.20161800  |
| C  | 2.85236600   | -4.92757600  | -0.50417800 |
| C  | 4.82407300   | -2.60947600  | -1.56810000 |
| C  | 6.74759200   | -1.76372000  | 0.75789000  |
| C  | 6.30063400   | -3.81657200  | 3.21368100  |
| C  | 3.92972200   | -5.81488800  | 2.37529900  |
| H  | 2.67984900   | -5.97062500  | -0.23282800 |
| H  | 2.97123600   | -4.88275800  | -1.58934600 |
| H  | 1.94845800   | -4.36156400  | -0.24605600 |
| H  | 4.58793000   | -1.54887900  | -1.42298700 |
| H  | 4.06619000   | -3.04626400  | -2.22068700 |
| H  | 5.80691000   | -2.68560800  | -2.04544200 |
| H  | 7.46623800   | -1.81639300  | -0.06768800 |
| H  | 7.31425900   | -1.69016900  | 1.68904300  |
| H  | 6.15792400   | -0.84422200  | 0.65864400  |
| H  | 5.77540600   | -3.12028300  | 3.87849500  |
| H  | 7.33561800   | -3.48547600  | 3.11561600  |

|   |            |             |             |
|---|------------|-------------|-------------|
| H | 6.30880100 | -4.80000800 | 3.68807800  |
| H | 4.67218100 | -6.23845600 | 3.05475100  |
| H | 3.50591100 | -6.63125300 | 1.78801600  |
| H | 3.12706800 | -5.37682000 | 2.98077200  |
| H | 6.59234700 | -6.07059000 | -1.93146600 |
| O | 7.67129200 | -3.73405900 | -1.86509100 |
| H | 6.99045300 | -5.42952100 | -2.08186600 |
| C | 8.77205200 | -3.09848200 | -2.00114500 |
| O | 9.27197700 | -2.25934000 | -1.22881500 |
| H | 9.33473300 | -3.33849400 | -2.93622800 |

**IM-4 + H<sub>2</sub>**

|   |              |             |             |
|---|--------------|-------------|-------------|
| C | -22.02176400 | -1.51245200 | 0.22839500  |
| C | -21.16339000 | 0.81129100  | 0.31449300  |
| H | -23.03691200 | -1.12673100 | 0.19667600  |
| C | -20.93986800 | -0.57297800 | 0.28892700  |
| C | -20.45274000 | -3.37254500 | 0.25907300  |
| C | -21.78852000 | -2.85250700 | 0.21365100  |
| C | -20.19571000 | -4.75114900 | 0.25500600  |
| H | -22.61379400 | -3.55771100 | 0.16982800  |
| C | -1.59207100  | 14.17896100 | -0.37507000 |
| C | -0.62770700  | 16.42340000 | -0.34262600 |
| C | -2.11354500  | 18.40844100 | -0.24112900 |
| H | 0.23880900   | 17.07875000 | -0.35772900 |
| H | -13.13841600 | 3.94836700  | -0.12999200 |
| C | -18.50622300 | -0.13302500 | 0.38749600  |
| H | 4.69055200   | 11.64982900 | 0.24900900  |
| C | -4.37730100  | 16.73804800 | -0.32102400 |
| C | -5.36189300  | 14.51369300 | -0.44413900 |
| C | -3.88819800  | 12.49146100 | -0.44240500 |
| C | -5.02348900  | 11.53727100 | -0.44022700 |
| C | -5.07439900  | 10.50072800 | -1.38790300 |
| C | -6.08968300  | 9.55383600  | -1.36269000 |
| C | -7.11216500  | 9.62855300  | -0.40357600 |
| C | -7.05831200  | 10.65072300 | 0.56081100  |
| C | -6.02743900  | 11.58373100 | 0.54148800  |
| H | -6.23422300  | 13.87777900 | -0.53043600 |
| H | -4.30501000  | 10.44673100 | -2.15192800 |
| H | -6.12532600  | 8.75120700  | -2.09177400 |
| H | -7.79884200  | 10.67997100 | 1.35394800  |
| H | -5.97752400  | 12.34336800 | 1.31502500  |
| C | -12.41777400 | 5.99651900  | 0.03850700  |
| C | -11.10054600 | 5.61944100  | -0.27928400 |
| C | -10.08563500 | 6.56240300  | -0.33111000 |

|   |              |             |             |
|---|--------------|-------------|-------------|
| C | -10.36593800 | 7.91308900  | -0.06336900 |
| C | -11.68255500 | 8.29017300  | 0.25662800  |
| C | -12.69842400 | 7.34717800  | 0.30588500  |
| H | -10.88250600 | 4.57472800  | -0.48550800 |
| H | -9.06643400  | 6.28542300  | -0.57603200 |
| H | -11.90034700 | 9.33457400  | 0.46469300  |
| H | -13.71782600 | 7.62480400  | 0.54954400  |
| C | -13.46545000 | 4.97663000  | 0.08254600  |
| N | -14.68514000 | 5.25445400  | 0.36446400  |
| C | 15.04961500  | 3.52402100  | 0.42788300  |
| C | 15.88694800  | 5.87789200  | 0.23044600  |
| C | 14.53250100  | 6.47459100  | 0.30600200  |
| C | 14.25944600  | 7.50630000  | 1.22063100  |
| C | 13.02120000  | 8.13440100  | 1.24555800  |
| C | 11.99757100  | 7.73364500  | 0.37205600  |
| C | 12.26683200  | 6.71080600  | -0.55547600 |
| C | 13.51346900  | 6.09667200  | -0.58517200 |
| H | 14.05260800  | 3.89242600  | 0.63769100  |
| H | 15.03333900  | 7.81194700  | 1.91796700  |
| H | 12.81356300  | 8.93547200  | 1.94719300  |
| H | 11.51376100  | 6.43596600  | -1.28730000 |
| H | 13.71918100  | 5.33635400  | -1.33180700 |
| C | 4.64703000   | 10.57816100 | 0.00562300  |
| N | 3.54991100   | 10.00296000 | -0.32503100 |
| C | -4.06481100  | 13.89647300 | -0.40272600 |
| C | -5.51110900  | 15.86537500 | -0.39652500 |
| C | -4.51387600  | 18.13415900 | -0.26759400 |
| H | -6.50258000  | 16.30842600 | -0.43196800 |
| H | 9.63491600   | 6.75148500  | -0.05201900 |
| C | 16.10480800  | 4.47636300  | 0.22523600  |
| H | -9.62229300  | 9.95490800  | 0.12956000  |
| C | -1.93048700  | 17.01764300 | -0.29402300 |
| C | -0.46710100  | 15.07301700 | -0.38987400 |
| C | -1.44614800  | 12.77030900 | -0.41470300 |
| C | -0.12450600  | 12.09798700 | -0.38564200 |
| C | 0.18253100   | 11.10491300 | -1.33144900 |
| C | 1.38911800   | 10.41881600 | -1.28686100 |
| C | 2.34871300   | 10.72508800 | -0.30906700 |
| C | 2.03976800   | 11.69993700 | 0.65632000  |
| C | 0.82136000   | 12.36888500 | 0.61719500  |
| H | 0.52783000   | 14.65047600 | -0.45543100 |
| H | -0.53822800  | 10.87860500 | -2.11115500 |
| H | 1.62420900   | 9.65119700  | -2.01661200 |
| H | 2.73852000   | 11.89616200 | 1.46349300  |

|   |              |              |             |
|---|--------------|--------------|-------------|
| H | 0.58218900   | 13.09261600  | 1.38981300  |
| C | 8.39717500   | 8.53527800   | 0.14730400  |
| C | 7.22015100   | 7.83365500   | -0.16985900 |
| C | 5.99653200   | 8.48475400   | -0.21540900 |
| C | 5.92116100   | 9.86089600   | 0.05875700  |
| C | 7.09712200   | 10.56097900  | 0.38302100  |
| C | 8.32092700   | 9.91070200   | 0.42542200  |
| H | 7.27754200   | 6.76955900   | -0.38420100 |
| H | 5.08268800   | 7.95661700   | -0.46354700 |
| H | 7.03977600   | 11.62519300  | 0.59672100  |
| H | 9.23572700   | 10.43951100  | 0.66824200  |
| C | 9.67783100   | 7.82768500   | 0.17023400  |
| N | 10.78039400  | 8.42436400   | 0.43887200  |
| C | -17.18270500 | -0.67296800  | 0.52249200  |
| C | -18.76934000 | 1.26080500   | 0.37301900  |
| C | -17.68363800 | 2.26951700   | 0.36744600  |
| C | -17.69977100 | 3.34152600   | 1.27599700  |
| C | -16.71347800 | 4.31945700   | 1.25014900  |
| C | -15.65614200 | 4.24386900   | 0.32973500  |
| C | -15.64897900 | 3.19060700   | -0.60253300 |
| C | -16.64796200 | 2.22462300   | -0.58135400 |
| H | -16.35544400 | 0.01171000   | 0.66460500  |
| H | -18.49346800 | 3.39554100   | 2.01479200  |
| H | -16.72568800 | 5.14558100   | 1.95332400  |
| H | -14.88307700 | 3.15835100   | -1.37098600 |
| H | -16.64666900 | 1.43488100   | -1.32578900 |
| C | -9.31235800  | 8.92765200   | -0.11178800 |
| N | -8.10474100  | 8.64010800   | -0.43201000 |
| C | -3.39262100  | 18.95899900  | -0.22433600 |
| C | -2.90894100  | 14.73982800  | -0.36379900 |
| H | -3.51624900  | 20.03695900  | -0.18333000 |
| C | -2.59138500  | 11.97121600  | -0.46294200 |
| C | -3.07170000  | 16.16017300  | -0.32372500 |
| H | -2.46829400  | 10.89309800  | -0.45522600 |
| C | -19.59622400 | -1.05639800  | 0.32757000  |
| C | -20.09999500 | 1.70250300   | 0.35374800  |
| H | -20.29246200 | 2.77074400   | 0.33773300  |
| C | 2.34124100   | -15.12158500 | -0.56887900 |
| C | 3.43706800   | -12.94828100 | -0.47712600 |
| C | 2.06404600   | -10.85787000 | -0.40709800 |
| C | 3.25484800   | -9.98087000  | -0.28153900 |
| C | 3.47583800   | -8.94262300  | -1.20395600 |
| C | 4.56948600   | -8.09331700  | -1.08604600 |
| C | 5.47508600   | -8.28265200  | -0.03519100 |

|   |              |              |             |
|---|--------------|--------------|-------------|
| C | 5.26801900   | -9.29883200  | 0.90247100  |
| C | 4.16131500   | -10.13655300 | 0.77794300  |
| H | 4.34237900   | -12.35399600 | -0.46962700 |
| H | 2.78453600   | -8.81739800  | -2.03170100 |
| H | 4.76659200   | -7.29265000  | -1.79149500 |
| H | 5.95668000   | -9.40811100  | 1.73450000  |
| H | 3.98582500   | -10.91036500 | 1.51820700  |
| C | 10.68746300  | -4.79561500  | 0.16838900  |
| C | 9.31479600   | -4.50896300  | 0.11048300  |
| C | 8.34638400   | -5.52204400  | 0.12415000  |
| C | 8.83653500   | -6.86107300  | 0.14402600  |
| C | 10.21171000  | -7.16007600  | 0.18953300  |
| C | 11.13558400  | -6.13380200  | 0.21466300  |
| H | 9.00701400   | -3.46810900  | 0.04885600  |
| H | 10.54016000  | -8.19658200  | 0.20162600  |
| H | 12.20176300  | -6.32206000  | 0.25808300  |
| C | 11.64978600  | -3.69246200  | 0.17811400  |
| N | 12.91072000  | -3.89135400  | 0.30054000  |
| C | -16.94924800 | -2.01422500  | 0.51122600  |
| C | -17.78968800 | -4.36751300  | 0.32160000  |
| C | -16.42941300 | -4.95620500  | 0.31243300  |
| C | -16.10242000 | -5.99953900  | 1.19581000  |
| C | -14.85339900 | -6.60527000  | 1.16082700  |
| C | -13.87106700 | -6.16742100  | 0.25820400  |
| C | -14.19624000 | -5.13806500  | -0.64338800 |
| C | -15.45528500 | -4.54886900  | -0.61525600 |
| H | -15.93900600 | -2.38126300  | 0.64542900  |
| H | -16.84113300 | -6.32907100  | 1.91988000  |
| H | -14.60346200 | -7.41279100  | 1.84091100  |
| H | -13.47577200 | -4.83646300  | -1.39725700 |
| H | -15.70389800 | -3.78092100  | -1.34070400 |
| C | -6.44321200  | -8.78235900  | -0.19584800 |
| N | -5.34332000  | -8.17015300  | -0.44144300 |
| C | -0.30924800  | -12.42275400 | -0.56569800 |
| C | -1.38227100  | -14.61075100 | -0.74532900 |
| C | -0.00186200  | -16.67329800 | -0.72221100 |
| H | -2.27796200  | -15.21684200 | -0.84994900 |
| H | 11.22593900  | -2.68066000  | 0.09154500  |
| C | 16.58522700  | 1.63975700   | 0.15797500  |
| H | -6.47327100  | -9.86780600  | -0.02156200 |
| C | -0.11430000  | -15.27469400 | -0.68032300 |
| C | -1.47453300  | -13.25406000 | -0.69845900 |
| C | -0.38458700  | -11.00876800 | -0.50692300 |
| C | -1.68005300  | -10.28721700 | -0.47528100 |

|   |              |              |             |
|---|--------------|--------------|-------------|
| C | -1.93639000  | -9.23515600  | -1.37034300 |
| C | -3.13726700  | -8.53639300  | -1.33205700 |
| C | -4.13808400  | -8.88739000  | -0.41240100 |
| C | -3.87247400  | -9.91194300  | 0.51384100  |
| C | -2.66237100  | -10.59454000 | 0.48092900  |
| H | -2.44348900  | -12.77722500 | -0.77743500 |
| H | -1.18547000  | -8.97742100  | -2.11102500 |
| H | -3.33704700  | -7.72904200  | -2.02873200 |
| H | -4.60255000  | -10.14208000 | 1.28333900  |
| H | -2.46107900  | -11.36580700 | 1.21754400  |
| C | -10.25206600 | -6.85331100  | -0.03773500 |
| C | -9.09183800  | -6.10357000  | -0.30266700 |
| C | -7.84786900  | -6.71552800  | -0.35584800 |
| C | -7.73625300  | -8.10038900  | -0.14624900 |
| C | -8.89696300  | -8.84979400  | 0.11787600  |
| C | -10.13968900 | -8.23824700  | 0.17201800  |
| H | -9.17727100  | -5.03225500  | -0.46544300 |
| H | -6.94617900  | -6.14842000  | -0.55866900 |
| H | -8.81141400  | -9.92121500  | 0.27972700  |
| H | -11.04178700 | -8.80427700  | 0.37505200  |
| C | -11.55377800 | -6.18578400  | 0.01544000  |
| N | -12.63409500 | -6.82500400  | 0.27639500  |
| C | 15.27759100  | 2.18174400   | 0.39887400  |
| C | 16.84118100  | 0.24564100   | 0.09621600  |
| C | 15.76732900  | -0.77370200  | 0.16826400  |
| C | 15.90426300  | -1.87797800  | 1.02817100  |
| C | 14.95633800  | -2.89123600  | 1.05390400  |
| C | 13.81313600  | -2.82291600  | 0.24101400  |
| C | 13.67075600  | -1.72622600  | -0.62775900 |
| C | 14.63605700  | -0.72489300  | -0.66396500 |
| H | 14.45969900  | 1.49696800   | 0.58733600  |
| H | 16.76896500  | -1.93310700  | 1.68227800  |
| H | 15.06957700  | -3.74748300  | 1.71053100  |
| H | 12.82851300  | -1.69081300  | -1.31179800 |
| H | 14.53371800  | 0.09151500   | -1.37175000 |
| C | 7.80339800   | -7.85220900  | 0.08952200  |
| N | 6.57987300   | -7.40552600  | 0.06959500  |
| C | 2.17035900   | -12.26922800 | -0.45806700 |
| C | 3.51820000   | -14.30571300 | -0.52197700 |
| C | 2.40719800   | -16.52307900 | -0.61254800 |
| H | 4.48765900   | -14.79599500 | -0.53899900 |
| H | -11.54670000 | -5.10142000  | -0.16792800 |
| C | -18.01263400 | -2.96718400  | 0.36165400  |
| H | 8.00146400   | -8.92225800  | 0.03504800  |

|    |              |              |             |
|----|--------------|--------------|-------------|
| C  | 0.79893800   | -10.26697800 | -0.45092600 |
| C  | 1.06704300   | -14.47812700 | -0.59243200 |
| H  | 0.73000200   | -9.18607800  | -0.37747800 |
| C  | 1.24655700   | -17.28937500 | -0.68506700 |
| C  | 0.97543000   | -13.05204400 | -0.53612400 |
| H  | 1.31563300   | -18.37244100 | -0.71847800 |
| C  | -18.89395600 | -5.23139000  | 0.28393200  |
| H  | -18.71504500 | -6.30138600  | 0.24612000  |
| C  | -19.35089100 | -2.46515600  | 0.31344900  |
| C  | 18.53385700  | 4.87649900   | -0.03589400 |
| C  | 19.86038300  | 4.35461300   | -0.19118500 |
| C  | 18.28467300  | 6.25554800   | 0.01383200  |
| H  | 20.68361700  | 5.05847900   | -0.27584200 |
| C  | 17.43399100  | 3.97122100   | 0.07338500  |
| C  | 16.99034600  | 6.73911200   | 0.14165900  |
| H  | 16.81405900  | 7.81019900   | 0.14015300  |
| C  | 20.08685000  | 3.01405300   | -0.23024600 |
| C  | 19.22639000  | 0.69249400   | -0.14308900 |
| H  | 21.09474300  | 2.62560900   | -0.34690700 |
| C  | 19.00755900  | 2.07709000   | -0.11477100 |
| C  | 18.16576800  | -0.19602300  | -0.04182700 |
| H  | 18.35288000  | -1.26358700  | -0.09947200 |
| C  | 17.67232700  | 2.56169500   | 0.03628800  |
| H  | -0.90593500  | -17.27204000 | -0.78815000 |
| H  | -1.23968100  | 19.05342600  | -0.21727600 |
| H  | -5.51101600  | 18.56534300  | -0.26437900 |
| H  | 19.11837900  | 6.94720800   | -0.06818000 |
| H  | 20.23966100  | 0.31901900   | -0.26156000 |
| H  | 3.38071400   | -17.00480500 | -0.59284900 |
| H  | -21.03057100 | -5.44495400  | 0.21238300  |
| H  | -22.18378700 | 1.18296100   | 0.28563900  |
| Ir | 6.33897300   | -5.34033400  | 0.08345700  |
| C  | 5.15956800   | -4.95750600  | 1.93149900  |
| C  | 6.07597700   | -3.87500000  | 1.69954900  |
| C  | 5.72447100   | -3.26491100  | 0.43119200  |
| C  | 4.50749700   | -3.91539300  | -0.03852200 |
| C  | 4.15872100   | -4.94255800  | 0.86699900  |
| C  | 2.97436800   | -5.85518400  | 0.79851000  |
| C  | 3.87644900   | -3.62402800  | -1.36155900 |
| C  | 6.32234400   | -2.03005200  | -0.16820700 |
| C  | 7.15123900   | -3.41283400  | 2.63122400  |
| C  | 5.11205100   | -5.85119200  | 3.13238100  |
| H  | 3.22571000   | -6.86290400  | 1.13701300  |
| H  | 2.59301400   | -5.94181000  | -0.22021200 |

|   |            |             |             |
|---|------------|-------------|-------------|
| H | 2.16197200 | -5.48296800 | 1.43537800  |
| H | 3.71503600 | -2.54933300 | -1.49222400 |
| H | 2.91544500 | -4.13073400 | -1.46974700 |
| H | 4.55076500 | -3.98099100 | -2.15119700 |
| H | 6.31987000 | -2.08770400 | -1.25948400 |
| H | 7.35689000 | -1.89354900 | 0.15669000  |
| H | 5.76382200 | -1.13169300 | 0.12515200  |
| H | 6.77113200 | -2.62352800 | 3.29087200  |
| H | 8.00831700 | -3.01187600 | 2.08712900  |
| H | 7.51424800 | -4.23233500 | 3.25494000  |
| H | 6.09099000 | -5.92056200 | 3.61134900  |
| H | 4.80351500 | -6.86244500 | 2.85394200  |
| H | 4.39669000 | -5.47619500 | 3.87504100  |
| H | 5.05155700 | -6.24007700 | -4.61357500 |
| O | 6.33985800 | -5.47836900 | -1.97715900 |
| H | 7.23509200 | -5.30409100 | -2.29461600 |
| H | 5.36182000 | -6.04632200 | -3.96047100 |

**IM-2 + H<sub>2</sub>**

|   |              |             |             |
|---|--------------|-------------|-------------|
| C | -22.11246400 | -1.44428800 | 0.56462700  |
| C | -21.23746300 | 0.87413700  | 0.62296400  |
| H | -23.12561400 | -1.05214900 | 0.55657400  |
| C | -21.02348400 | -0.51163900 | 0.59658500  |
| C | -20.55500300 | -3.31431700 | 0.56095800  |
| C | -21.88816400 | -2.78584700 | 0.54706300  |
| C | -20.30685700 | -4.69454600 | 0.55200300  |
| H | -22.71871800 | -3.48583500 | 0.52461900  |
| C | -1.62218300  | 14.13303700 | -0.62601500 |
| C | -0.65593100  | 16.37634400 | -0.67536800 |
| C | -2.14013200  | 18.36502800 | -0.64460800 |
| H | 0.21110500   | 17.02998600 | -0.71485800 |
| H | -13.20440400 | 3.95469600  | -0.01680300 |
| C | -18.58547300 | -0.08700900 | 0.63562900  |
| H | 4.65653800   | 11.63192500 | 0.10467900  |
| C | -4.40530700  | 16.69469100 | -0.66097100 |
| C | -5.39172000  | 14.46807300 | -0.70159000 |
| C | -3.91938000  | 12.44613100 | -0.62995800 |
| C | -5.05625200  | 11.49457800 | -0.59058100 |
| C | -5.11483600  | 10.42738100 | -1.50298000 |
| C | -6.13342400  | 9.48554300  | -1.44175400 |
| C | -7.15099400  | 9.59538400  | -0.48079800 |
| C | -7.08849400  | 10.64817200 | 0.44962200  |
| C | -6.05497200  | 11.57665500 | 0.39418100  |
| H | -6.26465500  | 13.83008300 | -0.76301200 |



|   |              |             |             |
|---|--------------|-------------|-------------|
| H | -4.34922300  | 10.34548000 | -2.26832400 |
| H | -6.17560400  | 8.65957900  | -2.14393000 |
| H | -7.82455000  | 10.70614100 | 1.24532700  |
| H | -5.99878300  | 12.36160800 | 1.14158200  |
| C | -12.46884300 | 6.00099000  | 0.10596000  |
| C | -11.15832100 | 5.61029500  | -0.22294600 |
| C | -10.13928700 | 6.54637600  | -0.30836800 |
| C | -10.40882200 | 7.90388300  | -0.06513500 |
| C | -11.71885800 | 8.29467300  | 0.26533700  |
| C | -12.73863100 | 7.35838600  | 0.34927400  |
| H | -10.94873700 | 4.56040700  | -0.41087300 |
| H | -9.12508600  | 6.25884800  | -0.56174700 |
| H | -11.92836700 | 9.34439800  | 0.45421300  |
| H | -13.75294800 | 7.64657700  | 0.60174000  |
| C | -13.52128600 | 4.98818200  | 0.18568600  |
| N | -14.73389200 | 5.27750600  | 0.48602800  |
| C | 14.99594600  | 3.52014700  | 0.66784500  |
| C | 15.85102800  | 5.86590800  | 0.44973800  |
| C | 14.49776400  | 6.46957200  | 0.47377200  |
| C | 14.20368600  | 7.52101500  | 1.35898400  |
| C | 12.96667200  | 8.15169800  | 1.33882700  |
| C | 11.96466000  | 7.73363400  | 0.44856500  |
| C | 12.25567500  | 6.69202100  | -0.45099300 |
| C | 13.50156100  | 6.07574600  | -0.43617300 |
| H | 13.99477600  | 3.89679300  | 0.83945500  |
| H | 14.95977200  | 7.83936600  | 2.07004100  |
| H | 12.74264600  | 8.96726300  | 2.01838600  |
| H | 11.52066100  | 6.40275900  | -1.19550100 |
| H | 13.72449300  | 5.29971700  | -1.16135400 |
| C | 4.61611800   | 10.55308600 | -0.10537800 |
| N | 3.52139800   | 9.96601100  | -0.42310200 |
| C | -4.09496400  | 13.85178100 | -0.64030300 |
| C | -5.53987600  | 15.82071300 | -0.70283100 |
| C | -4.54074000  | 18.09193100 | -0.65810600 |
| H | -6.53109100  | 16.26297200 | -0.75255800 |
| H | 9.61310300   | 6.73834200  | -0.00079700 |
| C | 16.06179800  | 4.46353000  | 0.47954400  |
| H | -9.65472200  | 9.94630900  | 0.06767400  |
| C | -1.95819900  | 16.97308000 | -0.64719300 |
| C | -0.49644400  | 15.02500600 | -0.67381400 |
| C | -1.47729900  | 12.72376500 | -0.61529600 |
| C | -0.15557600  | 12.05303300 | -0.56169700 |
| C | 0.15454300   | 11.02943700 | -1.47323600 |
| C | 1.36213600   | 10.34701000 | -1.40349500 |

|   |              |             |             |
|---|--------------|-------------|-------------|
| C | 2.31920000   | 10.68660800 | -0.43422200 |
| C | 2.00657600   | 11.69226100 | 0.49790300  |
| C | 0.78768500   | 12.35823900 | 0.43367100  |
| H | 0.49807600   | 14.59945300 | -0.72458400 |
| H | -0.56435700  | 10.77630300 | -2.24641300 |
| H | 1.59988900   | 9.55603500  | -2.10697100 |
| H | 2.70300200   | 11.91588100 | 1.29992800  |
| H | 0.54597400   | 13.10726100 | 1.18100500  |
| C | 8.36860900   | 8.52384300  | 0.13358500  |
| C | 7.19723900   | 7.81119500  | -0.17995500 |
| C | 5.97281900   | 8.45785000  | -0.25769800 |
| C | 5.89117500   | 9.84065500  | -0.02144200 |
| C | 7.06182800   | 10.55228900 | 0.29697100  |
| C | 8.28621700   | 9.90623200  | 0.37266000  |
| H | 7.25945900   | 6.74186200  | -0.36473400 |
| H | 5.06318500   | 7.92073800  | -0.50201800 |
| H | 6.99966000   | 11.62180800 | 0.48081500  |
| H | 9.19678500   | 10.44341900 | 0.61298300  |
| C | 9.64991800   | 7.81959700  | 0.19629900  |
| N | 10.74601000  | 8.42470400  | 0.47260100  |
| C | -17.26277200 | -0.63519600 | 0.74219500  |
| C | -18.83982400 | 1.30849200  | 0.62161600  |
| C | -17.74826600 | 2.31012600  | 0.58386500  |
| C | -17.73768300 | 3.38994300  | 1.48331400  |
| C | -16.74689200 | 4.36198800  | 1.42671100  |
| C | -15.71092500 | 4.27221500  | 0.48351900  |
| C | -15.73038200 | 3.21071300  | -0.43910200 |
| C | -16.73433900 | 2.25102100  | -0.38739200 |
| H | -16.42819000 | 0.04440600  | 0.86445200  |
| H | -18.51413700 | 3.45493700  | 2.23934400  |
| H | -16.73886100 | 5.19427900  | 2.12263800  |
| H | -14.98185800 | 3.16751100  | -1.22397600 |
| H | -16.75437200 | 1.45521600  | -1.12505000 |
| C | -9.35122400  | 8.91185100  | -0.14979700 |
| N | -8.14781900  | 8.61067100  | -0.47346400 |
| C | -3.41877400  | 18.91686600 | -0.64630100 |
| C | -2.93850900  | 14.69509900 | -0.63352800 |
| H | -3.54151000  | 19.99570800 | -0.64434000 |
| C | -2.62308500  | 11.92417100 | -0.63407700 |
| C | -3.10013900  | 16.11607800 | -0.64453000 |
| H | -2.50075300  | 10.84687700 | -0.58840900 |
| C | -19.68241300 | -1.00355500 | 0.60441200  |
| C | -20.16780200 | 1.75860500  | 0.63282100  |
| H | -20.35392200 | 2.82796500  | 0.61682300  |

|   |              |              |             |
|---|--------------|--------------|-------------|
| C | 2.26209700   | -15.01015900 | -0.97646600 |
| C | 3.33848100   | -12.83362600 | -0.78533500 |
| C | 1.94605600   | -10.76236300 | -0.60071200 |
| C | 3.12715400   | -9.88049200  | -0.43100400 |
| C | 3.32374900   | -8.77928800  | -1.28267500 |
| C | 4.40600600   | -7.92279400  | -1.11795200 |
| C | 5.32843200   | -8.16393400  | -0.09255100 |
| C | 5.14125200   | -9.24480400  | 0.77699800  |
| C | 4.04803600   | -10.09033300 | 0.60698400  |
| H | 4.23878000   | -12.23245300 | -0.75604300 |
| H | 2.62238000   | -8.60922300  | -2.09365100 |
| H | 4.57794300   | -7.07961700  | -1.77803100 |
| H | 5.83430000   | -9.39659500  | 1.59851500  |
| H | 3.89140500   | -10.91180500 | 1.29836700  |
| C | 10.57008300  | -4.73705600  | 0.38375700  |
| C | 9.20746400   | -4.42421900  | 0.26202000  |
| C | 8.23048800   | -5.42396900  | 0.23735100  |
| C | 8.68897600   | -6.76855600  | 0.27948600  |
| C | 10.05535100  | -7.09406900  | 0.39164300  |
| C | 10.99285200  | -6.08249100  | 0.45887700  |
| H | 8.91545800   | -3.38416900  | 0.15907000  |
| H | 10.36519600  | -8.13597200  | 0.41813100  |
| H | 12.05280600  | -6.28788000  | 0.55116200  |
| C | 11.54967200  | -3.64941500  | 0.41650800  |
| N | 12.80116700  | -3.86612300  | 0.59464900  |
| C | -17.03816900 | -1.97793100  | 0.72850000  |
| C | -17.89750900 | -4.32619500  | 0.55930300  |
| C | -16.54153800 | -4.92302100  | 0.51567300  |
| C | -16.19972500 | -5.97249700  | 1.38620200  |
| C | -14.95503700 | -6.58455800  | 1.31971100  |
| C | -13.99120500 | -6.14631900  | 0.39760900  |
| C | -14.33163600 | -5.11120500  | -0.49155400 |
| C | -15.58695900 | -4.51647900  | -0.43245600 |
| H | -16.02750600 | -2.35099200  | 0.84103700  |
| H | -16.92313500 | -6.30163000  | 2.12573100  |
| H | -14.69391200 | -7.39654000  | 1.99021800  |
| H | -13.62656100 | -4.80954500  | -1.25982400 |
| H | -15.84823300 | -3.74418300  | -1.14873000 |
| C | -6.57351400  | -8.75378700  | -0.23928000 |
| N | -5.47755500  | -8.13191600  | -0.47818800 |
| C | -0.41311700  | -12.34026100 | -0.82594000 |
| C | -1.46710400  | -14.52694700 | -1.10384000 |
| C | -0.06752200  | -16.57469500 | -1.19008300 |
| H | -2.35781500  | -15.13594400 | -1.23136300 |

|   |              |              |             |
|---|--------------|--------------|-------------|
| H | 11.14567200  | -2.63423600  | 0.29146900  |
| C | 16.52936300  | 1.62413000   | 0.48193700  |
| H | -6.60071400  | -9.84432500  | -0.09980000 |
| C | -0.19254800  | -15.18092100 | -1.07954000 |
| C | -1.57166100  | -13.17504700 | -0.99096000 |
| C | -0.50154600  | -10.93162400 | -0.69921200 |
| C | -1.80318800  | -10.22385600 | -0.62912600 |
| C | -2.07334600  | -9.13715500  | -1.47736700 |
| C | -3.27858700  | -8.44930300  | -1.40094400 |
| C | -4.26972400  | -8.84484900  | -0.48885300 |
| C | -3.99051700  | -9.90628300  | 0.39080100  |
| C | -2.77650100  | -10.57905100 | 0.31960700  |
| H | -2.54542700  | -12.70400500 | -1.03991300 |
| H | -1.32954500  | -8.84299300  | -2.21165500 |
| H | -3.48926700  | -7.61449800  | -2.06108400 |
| H | -4.71274200  | -10.17391400 | 1.15554300  |
| H | -2.56468900  | -11.37986200 | 1.02094900  |
| C | -10.37966200 | -6.83141800  | 0.02501100  |
| C | -9.22364400  | -6.07510600  | -0.23956000 |
| C | -7.98068800  | -6.68507900  | -0.32601100 |
| C | -7.86602200  | -8.07468000  | -0.15231400 |
| C | -9.02258600  | -8.83080200  | 0.11081600  |
| C | -10.26427200 | -8.22096400  | 0.19947700  |
| H | -9.31162100  | -5.00025200  | -0.37531600 |
| H | -7.08212400  | -6.11296000  | -0.52852300 |
| H | -8.93477800  | -9.90591000  | 0.24459200  |
| H | -11.16317200 | -8.79205300  | 0.40258700  |
| C | -11.67999000 | -6.16494100  | 0.11359500  |
| N | -12.75596400 | -6.80748100  | 0.38402800  |
| C | 15.21764300  | 2.17656400   | 0.67113100  |
| C | 16.77940200  | 0.22783900   | 0.45392600  |
| C | 15.69638100  | -0.78286100  | 0.50563300  |
| C | 15.79181700  | -1.87210000  | 1.38978300  |
| C | 14.83252600  | -2.87518700  | 1.40059700  |
| C | 13.71957600  | -2.81032000  | 0.54660800  |
| C | 13.62034600  | -1.72992800  | -0.34838700 |
| C | 14.59659900  | -0.73921500  | -0.36819400 |
| H | 14.39056300  | 1.49932600   | 0.84612800  |
| H | 16.63210600  | -1.92312200  | 2.07534200  |
| H | 14.91295400  | -3.71962400  | 2.07710500  |
| H | 12.80368600  | -1.69933600  | -1.06287700 |
| H | 14.52797600  | 0.06474400   | -1.09403600 |
| C | 7.64450800   | -7.74075300  | 0.15273100  |
| N | 6.42662100   | -7.28726600  | 0.06022400  |

|    |              |              |             |
|----|--------------|--------------|-------------|
| C  | 2.06582200   | -12.16836000 | -0.72363900 |
| C  | 3.43173800   | -14.18638200 | -0.89783800 |
| C  | 2.34072100   | -16.40715700 | -1.08887800 |
| H  | 4.40554500   | -14.66578500 | -0.94628700 |
| H  | -11.67589800 | -5.07769700  | -0.05188700 |
| C  | -18.11061800 | -2.92440700  | 0.60437500  |
| H  | 7.83633900   | -8.81218000  | 0.09552700  |
| C  | 0.67501000   | -10.18232600 | -0.61101700 |
| C  | 0.98200400   | -14.37841300 | -0.96045800 |
| H  | 0.59523100   | -9.10723700  | -0.48322600 |
| C  | 1.18670300   | -17.18001200 | -1.19103900 |
| C  | 0.87765200   | -12.95774500 | -0.83390800 |
| H  | 1.26545100   | -18.25943900 | -1.27754800 |
| C  | -19.00787700 | -5.18303100  | 0.54907200  |
| H  | -18.83686600 | -6.25415600  | 0.50693600  |
| C  | -19.44643100 | -2.41390400  | 0.58749200  |
| C  | 18.49994200  | 4.84728400   | 0.28695200  |
| C  | 19.82799400  | 4.31615500   | 0.18484700  |
| C  | 18.25633200  | 6.22818400   | 0.30030600  |
| H  | 20.65719700  | 5.01435900   | 0.11220900  |
| C  | 17.39250700  | 3.94944000   | 0.37963900  |
| C  | 16.96111500  | 6.72007600   | 0.37755700  |
| H  | 16.79050900  | 7.79170500   | 0.34865000  |
| C  | 20.04864900  | 2.97402600   | 0.18043400  |
| C  | 19.17349900  | 0.65849200   | 0.28597600  |
| H  | 21.05777000  | 2.57876200   | 0.10408700  |
| C  | 18.96136900  | 2.04446000   | 0.27980800  |
| C  | 18.10527800  | -0.22295000  | 0.36885000  |
| H  | 18.28818000  | -1.29236200  | 0.33746700  |
| C  | 17.62462600  | 2.53836900   | 0.37802700  |
| H  | -0.96646400  | -17.17811700 | -1.27910900 |
| H  | -1.26574900  | 19.00975100  | -0.64518800 |
| H  | -5.53753900  | 18.52377800  | -0.66921200 |
| H  | 19.09572500  | 6.91428000   | 0.23026600  |
| H  | 20.18812600  | 0.27801700   | 0.20823600  |
| H  | 3.31871400   | -16.87998000 | -1.09908300 |
| H  | -21.14688700 | -5.38305700  | 0.53029200  |
| H  | -22.25586700 | 1.25229200   | 0.61742300  |
| Ir | 6.22359700   | -5.19951500  | 0.10465100  |
| C  | 4.89633800   | -4.96443100  | 1.84366100  |
| C  | 5.93018200   | -3.96100800  | 1.88469300  |
| C  | 5.77301600   | -3.12228900  | 0.71346900  |
| C  | 4.58971100   | -3.58430300  | 0.01231800  |
| C  | 4.02855800   | -4.68936800  | 0.70700300  |

|                         |            |             |             |
|-------------------------|------------|-------------|-------------|
| C                       | 2.76181300 | -5.41636500 | 0.38303300  |
| C                       | 4.07839200 | -2.97536800 | -1.25403800 |
| C                       | 6.53514600 | -1.87468400 | 0.39448200  |
| C                       | 6.94404300 | -3.77064800 | 2.96851500  |
| C                       | 4.65142700 | -6.03059800 | 2.86587900  |
| H                       | 2.83016300 | -6.47626200 | 0.63671700  |
| H                       | 2.52568300 | -5.35044800 | -0.68155900 |
| H                       | 1.91513500 | -4.99323300 | 0.93867200  |
| H                       | 3.45231400 | -2.10381800 | -1.02645800 |
| H                       | 3.47408700 | -3.68492000 | -1.82332800 |
| H                       | 4.91119900 | -2.65058200 | -1.87920300 |
| H                       | 6.81590600 | -1.86610400 | -0.65981900 |
| H                       | 7.44848900 | -1.81390500 | 0.99122000  |
| H                       | 5.93616800 | -0.98339300 | 0.61970600  |
| H                       | 6.60165700 | -3.01481500 | 3.68524700  |
| H                       | 7.90274200 | -3.44370700 | 2.56083700  |
| H                       | 7.11948800 | -4.70034600 | 3.51369600  |
| H                       | 5.56865800 | -6.28107900 | 3.40290600  |
| H                       | 4.27592400 | -6.94465300 | 2.39937500  |
| H                       | 3.90808400 | -5.69763700 | 3.60017400  |
| O                       | 6.46664200 | -5.45794700 | -1.98108200 |
| C                       | 6.93066600 | -4.48089000 | -2.70043700 |
| O                       | 7.23772800 | -3.34698700 | -2.34774300 |
| H                       | 7.02682700 | -4.78642900 | -3.76283100 |
| <b>CO<sub>2</sub></b>   |            |             |             |
| O                       | 0.000000   | -0.000000   | 1.169174    |
| C                       | 0.000000   | 0.000000    | 0.000000    |
| O                       | 0.000000   | -0.000000   | -1.169174   |
| <b>H<sub>2</sub>O</b>   |            |             |             |
| O                       | 0.000000   | 0.000000    | 0.119188    |
| H                       | 0.000000   | 0.759286    | -0.476754   |
| H                       | -0.000000  | -0.759286   | -0.476754   |
| <b>HCOO<sup>-</sup></b> |            |             |             |
| O                       | 1.141497   | -0.208173   | 0.000003    |
| C                       | 0.000028   | 0.311159    | -0.000011   |
| O                       | -1.141507  | -0.208179   | 0.000003    |
| H                       | -0.000082  | 1.463860    | 0.000021    |
| <b>HCOOH</b>            |            |             |             |
| O                       | -1.058869  | -0.281399   | -0.000173   |
| H                       | -1.777777  | 0.367680    | 0.001111    |
| C                       | 0.130784   | 0.361883    | 0.000081    |
| O                       | 1.178535   | -0.219172   | 0.000049    |
| H                       | 0.035742   | 1.465589    | -0.000606   |
